# Supplementary material for: Fatty Acid Synthase Beta Dehydratase in the Lipid Biosynthesis Pathway Is Required for Conidiogenesis, Pigmentation and Appressorium Formation in Magnaporthe oryzae S6
Source: PubMed Central journal article supplement (PMC7582888; doi:10.3390/ijms21197224), 2020-09-30
Supplement: ijms-21-07224-s001.pdf [file ijms-21-07224-s001.pdf]

**Table S1.** Primers used in this study

| Primer               | Sequence 5'-3'                |
|----------------------|-------------------------------|
| FAS1pN5 Forward      | GGTACCGAACGACACCCTAAAGAATTC   |
| FAS1pN5 Reverse      | GGATCCATTGTGGTTTGTACGGTCCG    |
| FAS1pN3 Forward      | CCTGCAGGAAGAGTAAGATGGCGTCGTGA |
| FAS1pN3 Reverse      | GCATGCCGCTCCTTTCCCAACCAAATT   |
| FAS1A Forward        | ACACCTACGCGAGACAGGAGA         |
| FAS1A Reverse        | CGGTGGCTTGTC AGCATCTATG       |
| HYH Forward          | CATTACACCTCAGCCATGG           |
| HYH Reverse          | GGGCCCATGTCAACAAGAAT          |
| PEX6 Forward         | AAATTCACACTCCACCCTTCA         |
| PEX6 Reverse         | GCGACTCACACTGGGAATC           |
| ICL1 Forward         | GTGTACCCCGAGCAAAAACCT         |
| ICL1 Reverse         | ACCCGTCACCATCTTCTGC           |
| EF1 $\alpha$ Forward | TCAGAAGCATCATTGCTCCG          |
| EF1 $\alpha$ Reverse | GATCATGAAGTGCGATGTCGA         |

(A) FAS1 nucleotide sequence

```

atgtacggcaccgggtaccggccctcaaacgggcggtttctacgccgcggtcttcggcctcg 60
M Y G T G T G P Q T G V S T P R S S A S
ctccgcccattgaacctcacacacggctccctcgagacgtcgttcctaatacccacaaat 120
L R P L N L T H G S L E T S F L I P T N
ctgcaacttccatgcctctcagcttaaagatcggttcagtgcaagtttgctgctcctacg 180
L H F H A A S Q L K D R F S A S L P A P T
gatgagctggcacaagatgacgagccttcgctcggttcccagctcgttgcgaggtacatg 240
D E L A Q D D E P S S V P E L V A R Y M
ggattcgtcgcccgcgaagttgaggaggagggtgacgatgctcaaggctcctacgaggaa 300
G F V A R E V E E E G D D A Q G S Y E E
gtccttaagcttcttcttaacgagtttgagcgtgtcttctcaggggcaacgaagttcac 360
V L K L L L N E F E R V F L R G N E V H
gctctagcagccactctgcctggaattgacactaagaagctagaagtcattcgcagctat 420
A L A A T L P G I D T K K L E V I R S Y
tttgccaccagatacgtcttgaaccgagccatcaagccgatgcgtctgccctcttcagg 480
F A T R Y V L N R A I K P H A S A L F R
gcgtcggctgaggacaaggccaagatctacacatattcggaggacagggcaacattgag 540
A S A E D K A K I Y T I F G G Q G N I E
gagtactttgaggagctccgtgagctccacacaacctaccgtgtttttatagaggagctc 600
E Y F E E L R E L H T T Y R V F I E E L
atcactacgtcggcagagctgcttcaaacctgtccaaggatccatcagcggagaagctg 660
I T T S A E L L Q N L S K D P S A E K L
ttttccaaaggcctcgtatgtcatgtcattcagggcttcacaggcctgaggccacaccggacatt 720
F S K G L D V M S W L H R P E A T P D I
gattaccctggtgtcaccggctttagcttttcttaattggttggccagcttgctcac 780
D Y L V S A P V S F P L I G L V Q L A H
tatgaggtgacctgtaaagttttggcggtcccccgaagcgtctccgagaggttcagc 840
Y E V T C K V L G V P P S A L R E R F S

```

ggcgccactggacattcccaaggcattgttcttgcagctgccacagctgctgctgatacc 900  
G A T G H S Q G I V L A A A T A A A D T  
tggaaagaatggcccactattgtcaagaagaccttgaccatcttgttctggattggagcg 960  
W K E W P T I V K K T L T I L F W I G A  
cgcagccagcagacctttccccgcacttcaatcacgccgtcgattcttcaagattctgtc 1020  
R S Q Q T F P R T S I T P S I L Q D S V  
gacaatggagaggggaatccccaccctatgcttagcatcagggatcttccccaaagccgag 1080  
D N G E G I P T P M L S I R D L P Q A E  
gtacagaagcacattgacaagaccaacgagtaccttccccgcgatcgccataatctccatt 1140  
V Q K H I D K T N E Y L P A D R H I S I  
tctctcataaacgccccgcaacatgggtgttacaggacctccgatttctctctacgggt 1200  
S L I N S P R N M V V T G P P I S L Y G  
ctcaacctccagctcagaaaagtcaaggcccaaccggcttggaccagaacagaataccg 1260  
L N L Q L R K V K A P T G L D Q N R I P  
tactcagcgaaggttcgcttggtaacaggttcttacctatcacccgcccatttcac 1320  
Y T Q R K V R F V N R F L P I T A P F H  
agcaagtacttggctgaagccacctctatgattgataacgacttgcagtacactcacttc 1380  
S K Y L A E A T S M I D N D L Q Y T H F  
gaagtgaaggacctcaagatccccgctcttggactcacactggcaagacattcgagag 1440  
E V K D L K I P V F D T H T G K D I R E  
gaggttaagggtaacatcgttcccaccctcatccgactcatcacccgggacccgggtccac 1500  
E V K G N I V P T L I R L I T R D P V H  
tgggagaaggcaactgtcttccccggcgcaactcatgttcttggatttcggcccaggtgga 1560  
W E K A T V F P G A T H V L D F G P G G  
atctccggattgggaattctcaccagccgtaacaaggatggactggagtacgcgtcatc 1620  
I S G L G I L T S R N K D G T G V R V I  
ctagctggctctgttgtggaactgtgacagaggtgggttacaagccagagctttttgac 1680  
L A G S V A G T V T E V G Y K P E L F D  
cgggatgaggaacacgctgtgaagtacgctattgattgggtcaaggagtacgggtcccaag 1740  
R D E E H A V K Y A I D W V K E Y G P K  
ttgatcaagactgccactggccgcacctacgttgataccaagatgagttaggctgcttggga 1800  
L I K T A T G R T Y V D T K M S R L L G  
cttccctcctgtcatggtagcaggtatgacccccgtgcactgtcaaattgggactttgttgcg 1860  
L P P V M V A G M T P C T V K W D F V A  
gcaaccatgaacgctggttatcacatcgagctggcgggaggcggttactttgagcctagg 1920  
A T M N A G Y H I E L A G G G Y F E P R  
atgatgaccgatgcccttgtcaagattgagaaggcgattcctgctggccgcggtatcagc 1980  
M M T D A L V K I E K A I P A G R G I S  
gtcaaccttatctacgtcaacccccgcgcgatgcagtggcagataccggttgattgggctg 2040  
V N L I Y V N P R A M Q W Q I P L I G R  
cttcgatctcaaggcgttcccacgaggggtctcactatcgggtgctggtgtgccttcgatc 2100  
L R S Q G V P I E G L T I G A G V P S I  
gaggttgccaacgaatacatccaaactctgggtctcaagcacatttctttcaagccggga 2160  
E V A N E Y I Q T L G L K H I S F K P G  
tcgacagacgctattcaagctgtcatcaacattgccaatgccaacccccacattccccgctc 2220  
S T D A I Q A V I N I A N A N P T F P V  
atgctgcagtgactggaggtcgtggtgggtggacaccactcgttcgaggacttcaccag 2280  
M L Q W T G G R G G G H H S F E D F H Q  
cctgtgctgctcatgtacaacaggattcgcaagtgtgacaacctgatcctgatcgcaggc 2340  
P V L L M Y N R I R K C D N L I L I A G  
agcggcttcggtggtgccgaggacacttatccttacatcactggagagtgggtccagaaag 2400  
S G F G G A E D T Y P Y I T G E W S R K  
ttcggttatcccccatgcctttcgtatgggtgtctgtttggaagtgcgctcatggttggc 2460  
F G Y P P M P F D G C L F G S R V M V A  
aaggaggcgcacactgccccggcagccaagcaagccatcgtcgtatgcacctgggtgttgac 2520  
K E A H T A P A A K Q A I V D A P G V D  
gatgacgagtgggagaaaacttacaatggcgttgagggtggcatcacgaccgttctgtcg 2580  
D D E W E K T Y N G V A G G I T T V L S  
gagatgggagagccaatccacaagattgccacgcgtgggtgtcaagttctgggtccgagatg 2640  
E M G E P I H K I A T R G V K F W S E M  
gaccagaagatcttcagcttgccttgccttgccttgccttgccttgccttgccttgccttgc 2700

D Q K I F S L P K E K R V P E L K K M R  
agctacataatcgagaagttaaacaaggacttccacaaagtttggttcggcaagaacaag 2760  
S Y I I E K L N K D F H K V W F G K N K  
gccggacaggccgttgacctgaggacatgacatacgccgaggtagtcctgcgatggtc 2820  
A G Q A V D L E D M T Y A E V V R R M V  
gagctcatgtatgtcaagcatgagtctcgtggattgaccccagcttcatgcgtttgact 2880  
E L M Y V K H E S R W I D P S F M R L T  
ggtgacttcatccaccgagtcgaggagcggtttgttcagagctctgggcagccttctctt 2940  
G D F I H R V E E R F V Q S S G Q P S L  
ctccaacactacagatcttacacaaaccttcgagactattgaaaagatcctggcacac 3000  
L Q H Y T D L T Q P F E T I E K I L A H  
tacctcaggctgaggatcagcttatcaacgccaggtatgcccagcacttcttcaactc 3060  
Y P Q A E D Q L I N A Q D V Q H F L Q L  
tgcgatgaggccaatccagaagcctggtgttttcgtgccagctctggacgacaattttgac 3120  
C M R P I Q K P V V F V P A L D D N F D  
ttctacttcaaaaaagactcactgtggcagtcgaggatctccaggccgtcatggaccag 3180  
F Y F K K D S L W Q S E D L Q A V M D Q  
gacgtccagcgtacttgtattttgaggaccatggctgttcgctattctactgtggtc 3240  
D V Q R T C I L Q G P M A V R Y S T V V  
gacgagcctatccagagcatccttgatggcgttcatgaagggcacattgccggtctcagc 3300  
D E P I Q S I L D G V H E G H I A G L S  
aaagatttgtaccaaggaaagacatcaaccctcccttcgatcgagtacttcggaggaaag 3360  
K D L Y Q G K T S T L P S I E Y F G G K  
ctcatggagcgtgaattccccgatgttgactcgattgatggtttgagtgtttccgaggaa 3420  
L M E R E F P D V D S I D G L S V S E E  
agaggtgttagagacatcttccgcactcgtcgtccccgtctcagaccatgccaagcagc 3480  
R G V R D I F R I S L S P S Q T M P S T  
gatcattgtttgtcacttccggaccgccctcatggcgccacgccttptgtgatg 3540  
D H W L S L I A G P T R S W R H A L L M  
tcggagggtgattgtccaaggcacaagttccagagcaaccgatgaggcgtatttttgcc 3600  
S E V I V Q G T K F Q S N P M R R I F A  
ccttgccgcggtctttttgttgaagttcgtaccccaaggatccagcatccacacaaatc 3660  
P C R G L F V E V R Y P K D P A S T Q I  
attgttagggagcaaccagacacaaccactacgtcgtatgttttggttgcccgtctctct 3720  
I V R E Q P R H N H Y V D V L V A R L S  
Ggcaagaatgagatcattgtagagctgatcaaggacaccactgcattgggtaagccggtt 3780  
G K N E I I V E L I K D T T A L G K P V  
Tctctgcctctcaagttcatctataagcccaggctggatagcctcctctgcacgaagtc 3840  
S L P L K F I Y K P E A G Y A P L H E V  
Atggatgaccgcaatgaccgcatcaaggagtttactggcgagcttggtttgccgatgag 3900  
M D D R N D R I K E F Y W R A W F G D E  
Aagcttgagctggatgccaacgtcgcagtgcttttgacggaggcaaggatgtcgtgaca 3960  
K L E L D A N V D S A F D G G K D V V T  
Agcgaagcgatcaacgactttgtccatgctgctcggcaacacgggcaagccttcggtgac 4020  
S E A I N D F V H A V G N T G E A F V D  
Cggcctggaaggtcatgtatgcgccatggacttcgcatcgttgcggctggaaggca 4080  
R P G K V M Y A P M D F A I V V G W K A  
Ataaccaagcccattttccctcgaagatcgatgggtgacctcctcaaccttgtccacctt 4140  
I T K P I F P R K I D G D L L N L V H L  
Tccaaccagttccgcatgaagccaggtgctgagcctctcaagaaggagatgaggtttct 4200  
S N Q F R M K P G A E P L K K G D E V S  
Acagtttcacgagtcaacgccgttgcattcaagaatctggaaagatggctcgaggtctgc 4260  
T V S R V N A V V I Q E S G K M V E V C  
Ggtaccatcacccgcatgggtgaaccagtcattggaggatgacatcccagttttgtaccgg 4320  
G T I T R D G E P V M E V T S Q F L Y R  
Ggaacctacaccgatttcgagaacacattccagagcaagatcgagacaccaatgcagatc 4380  
G T Y T D F E N T F Q S K I E T P M Q I  
Cacctcgcgacttccaaggacgtcgccttctacggtcgaaggaatggttcacctcga 4440  
H L A T S K D V A V L R S K E W F T L E  
Gacaacgttaacatggacttgcgtggggcagacacttatcttccgtctccagctcttctgtc 4500  
D N V N M D L L G Q T L I F R L Q S L V

Cgtttcaagaacaccaccgtgttcagcagcgtgcagactcgcggtgaggtactttagag 4560  
R F K N T T V F S S V Q T R G E V L V E  
Ctgcctacaaaggagatcgtccaagtcggcagtgctcagatgaagctggtacctcgcac 4620  
L P T K E I V Q V G S V E Y E A G T S H  
Gaaacccccgtgattgatttcttggagcgaacggttcttcgatcgcagcagccaatcaac 4680  
G N P V I D F L E R N G S S I E Q P I N  
Tttgagaacccgattcccccttagtggcaagactccccctccagcttcgggccccgcctcg 4740  
F E N P I P L S G K T P L Q L R A P A S  
Aacgagacatacgcagagtgcttggcagactacaacccattcacgtttctcgggttttt 4800  
N E T Y A R V S G D Y N P I H V S R V F  
Gcaactatgccgatctgcgggcacatcacccatggcatgtactctagtgcggcggtg 4860  
A N Y A D L P G T I T H G M Y S S A A V  
Cgtagcctggctcgcagacttgggcagctgaaaatgacaacagcagagtcaggagcttcac 4920  
R S L V E T W A A E N D N S R V R S F H  
Gcatcattggctcggcatggtgctgcccaacgatgacttgcctggtcaaattgcagcatgtt 4980  
A S L V G M V L P N D D L L V K L Q H V  
Ggtatggttgcggcagcaagatcatcaaggttgaggtcatcaacaaggagactgaggac 5040  
G M V A G R K I I K V E V I N K E T E D  
Aaggtgctgttgggagaggccgaggttgagcagcccgtgaccgctacgtgttactgga 5100  
K V L L G E A E V E Q P V T A Y V F T G  
Caaggttcgcaagagcaaggtatgggcatggagctgtacgaaagcagcccgggtgccaag 5160  
Q G S Q E Q G M G M E L Y E S S P V A K  
Gaagtttgggaccgcgcagacaagtacttgatggacacatatggattcgcgatcacaat 5220  
E V W D R A D K Y L M D T Y G F A I T N  
Attgtcaagaacaaccccccaaggagctcaccattcactttggaggccctcgtggcaaggct 5280  
I V K N N P K E L T I H F G G P R G K A  
Attcgcgccaactatggccatgaccttcagactgttgcctgcggacggaacctcaaa 5340  
I R A N Y M A M T F E T V A A D G T I K  
Tctgagcgcacatctcaaggatatcaacgagaggacaacttcatacacttaccggctcct 5400  
S E R I F K D I N E R T T S Y T Y R S P  
Acaggcctgctctcagcgcacacagttcactcaacccgccctgacactgatggagaaggca 5460  
T G L L S A T Q F T Q P A L T L M E K A  
Agcttcgaagacatgaaggctaagggactggtccctcgcgcagactctttgcccgtcat 5520  
S F E D M K A K G L V P R D S T F A G H  
Tccttgggtgaataactcggctctcgcctggtgatgtcatgccattgagagtttg 5580  
S L G E Y S A L A A L A D V M P I E S L  
Gtctctgtcgttttctaccgtggtctcacgatgcaggtcgcctgtggagcgtgacgccagt 5640  
V S V V F Y R G L T M Q V A V E R D A S  
Ggaaggtccaactactcaatgtgcgccgtcaacccgagccgtatctccaagaccttcaac 5700  
G R S N Y S M C A V N P S R I S K T F N  
Gaggaggctctccgcttcgctcgtcggcaacatcgccgagggaaacgggctggttgcgag 5760  
E E A L R F V V G N I A E G T G W L L E  
Atcgtcaactacaacatcgcaaacatgcaatacgtttgcgctggagatctccgggctctg 5820  
I V N Y N I A N M Q Y V C A G D L R A L  
Gatacgttaccatgtgtcactacctaaggcacagaagatcgacattgaggctatg 5880  
D T L T N V L N Y L K A Q K I D I E A M  
Aaggtgccatgacagtcgaggacgtcaagcagcacctgcaggagatcatcaaggcgtcc 5940  
K A A M T V E D V K Q H L Q E I I K A S  
Gccgagaagacggaggccaagcccaagcccttggagcttgagaggggctttgcaaccatc 6000  
A E K T E A K P K P L E L E R G F A T I  
Ccgtgcgtggaatcgacgtgcctttccattcgcctttttgcgagcgggtgtaaagccg 6060  
P L R G I D V P F H S T F L R S G V K P  
Tttaggtcattcctgcttaagaagatcaacaagacaaccattgaccctcaaaactgctc 6120  
F R S F L L K K I N K T T I D P S K L L  
Gaaagtacattcctaactgacccggaagcctttcgcactaccaaggagttacttcgag 6180  
G K Y I P N V T A K P F A L T K E Y F E  
Gatgtctataggttgaccaactcgctcgcattgcttcgatcttggccaactgggagcaa 6240  
D V Y R L T N S P R I A S I L A N W E Q  
Taccagaacgagaacgcgggttccgtccaccatcggccttggcgccaacgggtgcgggcat 6300  
Y Q N E N A V P S T I G L G A N G A G D  
Gccaacggcgagaccaccgagaatggcgtggaagaagcgaacggcgccaacggagtcac 6360

A N G E T T E N G V E E A N G A N G V H  
tag  
\*

(B) FAS1 protein sequence

MYGTGTGPQTGVSTPRSSASLRPLNLTHGSLETSFLIPTNLHFHASQLKDRFSASLPAPTDELAQDDEPS 70  
SVPELVARYMGFVAREVEEEGDDAQQSYEEVLKLLLNEFERVFLRGNEVHALAATLPGIDTKKLEVIRSY 140  
FATRYVLNRAIKPHASALFRASAEDKAKIYTIFFGGQGNIEEYFEELRELHTTYRVFIEELITTSAEELLQN 210  
LSKDPSAEKLFSGKLDVMSWLHRPEATPDIDYLVSAFVSFPLIGLVQLAHYEVTCVKLVGPPSALRERFS 280  
GATGHSQGIVLAAATAAADTWKEWPTIVKKTLLTILFWIGARSQQTFFPRTSITPSILQDSVDNAGEGIPTPM 350  
LSIRDLPQAEVQKHIDKTNEYLPADRHSISLINSRPNMVVTGPPISLYGLNLQLRKKVAPTGLDQNRIP 420  
YTQRKVRVFNRFPLPITAPFHSKYLAEATSMIDNDLQYTHFEVKDLKIPVFDTHTGKDIREEVKGNIVPTL 490  
IRLITRDPVHWEKATVFPFATHVLDVDFGPGGISGLGILTSRNDKGTGVRVILAGSVAGTVTEVGYKPELFD 560  
RDEEHAVKYAIDWVKEYGPKLIKTATGRTYVDTKMSRLLGLPPVMVAGMTPCTVKWDFVAATMNAGYHIE 630  
LAGGGYFEPMMTDALVKIEKAI PAGRGISVNLIYVNPAMQWQIPLIGRLRSQGVPIEGLTIGAGVPSI 700  
EVANEYIQTGLGLKHISFKPGSTDAIQAVINIANANPTFPVMLQWTGGRGGGHHSFEDFHQPVLLMYNRIR 770  
KCDNLILIAGSGFGGAEDTYPYITGEWSRKFYPPMFFDGCLFGRVMVAKEAHTAPAAKQAIVDAPGVD 840  
DDEWEKTYNGVAGGITTVLSEMGEPIHKIATRQVKEFWSEMDQKIFSLPKEKRVPELKKMRSYIIIEKLNKD 910  
FHKVWFQKNGKAGQAVDLEDMTYAEVVRMVELMYVKHESRWIDPSEFMRLTGDFIHRVEERFVQSSGQPSL 980  
LQHYTDLTQPFETIEKILAHYPQAEQDLINAQDVQHFLQLCMRPIQKPVVFPALDDNDFYFKKDSLWQ 1050  
SEDLQAVMDQDVQRTCILQGPMAVRYSTVVDEPIQSILDGVEHGHIAGLSKDLYQGKTSTLPSIEYFGGK 1120  
LMEREFDPDVSIDGLSVSEERGVRDIFRISLSPSQTMPSTDHWSLSIAGPTRSWRHALLMSEVIVQGTFK 1190  
QSNPMRRI FAPCRGLFVEVRYPKDPASTQIIVREQPRHNHYVDVILVARLSGKNEI IVELIKDTTALGKPV 1260  
SLPLKFIYKPEAGYAPLHEVMDRNDRIKEFYWRAWFGDEKLELDANVDSAFDGGKDVVTSEAINDFVHA 1330  
VGNTGEAFVDRPGKVMYAPMDFAI VVGWKAITKPIFPRKIDGDLNLVHLSNQFRMKPGAEP LKKGDEV S 1400  
TVSRVNAVVIQESGKMVEVCGTITRDGEPVMEVTSQFLYRGTYTDFENTFQSKIETPMQIHLATSKDVAV 1470  
LRSKEWFTLEDNVNMDLLGQTLIFRLQSLVRFKNTTVFSSVQTRGEVLVELPTKEIVQVGSVEYEAGTSH 1540  
GNPVIDFLERNGSSIEQPINFENPIPLSGKTPQLRAPASNETYARVSGDYNPIHVS RVFANYADLPGTI 1610  
THGMYSAAVRSLVETWAAENDNSRVRSFHASLVGMVLPNDLLVKKLQHVGMVAGRKI IKVEVINKETED 1680  
KVLLGEAEVEQPVTAYVFTGQGSQEQQGMGMELYESSPVAKEVWDRADKYLMDTYGFATNIVKNNPKELT 1750  
IHFGGPRGKAIRANYMAMTFETVAADGTIKSERIFKDINERTTSYTYRSPTGLLSATQFTQPALTLMEKA 1820  
SFEDMKAKGLVPRDSTFAGHSLGEYSALAALADVMPIESLVSVVYRGLTMQVAVERDASGRSNYSMCAV 1890  
NPSRISKTFNEEALRFVVGNI AEGTGWLEIVNYNIANMQYVCAGDLRALDRTLTVNLNLYLKAQKIDIEAM 1960  
KAAMTVEDVKQHLQEI IKASAEKTEAKPKPLELERGFATIPLRGIDVPFHSTFLRSGVKPFRSFLKKIN 2030  
KTTIDPSKLLGKYIPNVTAKPFALTKEYFEDVYRLTNSPRIASILANWEQYQENAVPSTIGLGANGAGD 2100  
ANGETTENGVEEANGANGVH

**Figure S1.** A. The nucleotide and protein sequence of the FAS1 gene of *Magnaporthe oryzae* 70-15. The sequence shows alignment of nucleotide sequence above and amino acid sequence below FAS1 gene using ExPASy Translate Tool. The asterisk indicates the location of the STOP CODON. B. The translated protein sequence of the FAS1 protein. The sequences were obtained from NCBI.

CLUSTAL O(1.2.4) multiple sequence alignment

```

NP_594370.1      -----MVEAEQVHQSLRSLVLSYAHFSPSILIPASQYLLAAQLRDEFSLHPAPS      50
XP_003719712.1  MYGTGTGPQTGVSTPRSSASLRPLNLTHGSL ETSFLIPTNLHFHASQLKDRFSASLPAPT      60
XP_962465.1     MYGTGTGAQTGVTTPRSSASLRPLTVSHGSL ETSFLIPTGLHFHATQLKERFAAILPAPT      60
NP_984945.2     -----MSGITTRSLALGHGAL EHTLSVPTGLYLTASQLAASFQKQVAPT      45
NP_012739.1     -----MDAYSTRPLTSLHGSLEHVLLVPTASFFIASQLQE QFNKILPEPT      45
XP_451653.1     -----MSSSTRPLSLSHGSI EHVLSIPTSSFFTASQLQDQFHKQLPEAT      44
                : * * * : . . : : * : . : * : * * * * :
                :
NP_594370.1      AESVEKEGAELFEHELHLLAGFLGLIAK----EEETPGQYTQLLRIITL E FERTFLAG      106
XP_003719712.1  DELAQDDEPS----SVPELVARYMGFVAREVEEEGDDAQGSYEVLKLLN EFERVFLRG      116
XP_962465.1     DELAQDDEPS----SIFELVARYMGFIATEVTQGEDDAQGSYEVLK IILNEFERAFLRG      116
NP_984945.2     EGYASDEEPA----SSAELLAKFVGHVAAQ--A---GAGGEVAAVLELALDEF EASYMCG      96
NP_012739.1     EGFAADDEPT----TPAELVGKFLGYVSSLVEP---SKVGGQFDQV LNLCLTEFENCYLEG      98
XP_451653.1     EGFAADDEPT----SSAELLAKFLGYVSSLVDV---TTKGGQFDDVLEIALSDFEANYLQG      97
                . . : . * . : * : : * : * : * : * : *
                :
NP_594370.1      NEVHAVVHSLGL-----NIPAQKDVVRFYHSCALIGQTTKF-HGSALL---DESSVKL      156
XP_003719712.1  NEVHALAATLPGIDT-----KKLEVIRSYFATRYV LNRRAIKP-HASALFRASAEDKAKI      169
XP_962465.1     NDVHALVSTMEGIDD-----KKLEVIRCYYLARSASNRAIKP-YESALFRAAGENA AKI      169
NP_984945.2     EEVHRVAARLLADDEOPTALPKVKELVQHVVYGSVRAQRPLMHR-RPALLESATRGDARV      155
NP_012739.1     NDIHALAAKLLQEND--TTLVKTEL IKNYITARIMAKRPFDKKSNSALFRAVGE GNAQL      156
XP_451653.1     NDVHTLAARLLQSEDNITTLPKVKEL IKNYYNARVTAKKPFTA-TDSALFKGVAAGQAKL      156
                :::* . : : : : : * : : : * : * : * : . . :
                :
NP_594370.1      AAIFFGGQGY-EDYFDELI ELYEVYAPFAAELIQVLSKHLFTLS-QNEQASKVYSKGLNVL      214
XP_003719712.1  YTIFFGGQNIIEEYFEELRELHHTYRVFIEELITTS AELLQNLK-DPSAEKLFKGLDVM      228
XP_962465.1     FTIFFGGQNIIEEYFEELRELHHTYPAFVGELITTS AELLQTLK-SHPDAEKMPYKGLDVL      228
NP_984945.2     VAVFFGGQNTDDYFEELRELHQMYGVLVEDVLDTAAEQ LNELLRRTTEGAEKMYTQGLDFR      215
NP_012739.1     VAIFFGGQNTDDYFEELRDLYQTYHVLVGDLIKFAETLSELIRTTLD AEFVFTQGLNIL      216
XP_451653.1     VSIFFGGQNTDDYFEELRELYQTYNCLISDVIKSA AETLGEIITTTDDTEKLYTQGF DIL      216
                : : * * * * : : * * * * : * : * : * : * : * : * : * : * : * : *
                :
NP_594370.1      DWLAG--ERPERDYLV SAPVSLPLVGLTQLVHFSVTAQ IGLNPGELASRFSAASGHSQG      272
XP_003719712.1  SWLHRPEATPDIDYLV SAPVSPFLIGLVQLAHYEVTC KVLGVPPSALRERFSGATGHSQG      288
XP_962465.1     GWLQSP EATPDVDYLV SAPVSPFLIGLVQLAHYQVTC KVLGVHPGVLRERISGTTGHSQG      288
NP_984945.2     QWLAQPERTPDNDY LLLIPISCP LIGILQLAHYAVTARIVGITPGELRACMVGTGHSQG      275
NP_012739.1     EWLENPSNTPDKDY LLSIPISCP LIGVIQLAHYVVTAKLLGFTP GELRSYLKGATGHSQG      276
XP_451653.1     TWLEQPQKTPGTDY LLSIPISCP LIGVIQFVHYTLTARILNFTP GQLRDSL VGATGHSQG      276
                ** * * * * : * : * * * * : * : * : * : * : * : * : * : * : * : *
                :
NP_594370.1      IVVAAAVSASTDSASF MENAKVALTTLFWIGVRSQQTFPRTTLL PPSVADSLASSEGNPT      332
XP_003719712.1  IVLAAATAAADTWKEWPTIVKKTLLILFWIGAR SQQTFPRTSITPSILQDSVDNGEGIPT      348
XP_962465.1     VVLSAITAAADSWESFEH SKAALTILFWIGAR SQQTFPRTSLAP SMLQDSADNGEGVPT      348
NP_984945.2     LSTAVAVAEADTWE SFFCALRKTVSLLFFIGVRCYQVYK TSLPPSILED SLENGEGKPS      335
NP_012739.1     LVTAVAI AETDWSWESFFVSRKAITV LFFIGVRCYEA YPNTSLPPSILED SLENNEGVP S      336
XP_451653.1     LATAVAI A EADSWESYFKAMTKTIKLLFFIGVRCYQVYK TSLPPSML EDSVENGEVPT      336
                : . . : : . : : : * * * * * . : : * * : * : * : * * . . * * * :

```

|                |                                                                        |     |
|----------------|------------------------------------------------------------------------|-----|
| NP_594370.1    | PMLAVRDLPIETLNKHIETTNTHLPEDRKVSLSLVNGPRSFVWVSGPARSLYGLNLRLRKE          | 392 |
| XP_003719712.1 | PMLSIRDLPQAEVQKHIDKTNAYLPADRHISISLINSRNMVVTGPPISLYGLNLQLRKV            | 408 |
| XP_962465.1    | PMLSIRDLPQAEVQKHIDQTNAYLPEDQHISIALINSRNMVAVGPPSSLHGLNLQLRKL            | 408 |
| NP_984945.2    | PMLSVSNLTQEQVQEFVEKTNALPSEKHIVISLVNGARNLVVSGPPQSLYGLNLALRRA            | 395 |
| NP_012739.1    | PMLSISNLTQEQVQDYVKNLNSHLPAGKQVEISLVNGAKNLVVSGPPQSLYGLNLTLRKA           | 396 |
| XP_451653.1    | PMLSISNLTQDQVQTYIDQTNALPESKHIVSVLVNGARNLVVSGPPQSLYGLNLTLRKA            | 396 |
|                | ***: : * : : : : * : * : : : : * : * : : : * : * : * : * : * : * : * : |     |
| NP_594370.1    | KA-DGQNQSRIPHSKRKLRFINRFLSISVPFHSPYLAPVRSLLKDLQG---LQFSALK             | 447 |
| XP_003719712.1 | KAPTGLDQNRIPYTQRKRVFVNRFLPITAPFHSKYLAEATSMIDNDLQY--THFEVKDLK           | 466 |
| XP_962465.1    | KAATGLDQTRIPHTERKRVFVNRFLPITAPFHSKYLAKASDLIAEDLKD--VQIDSRITLG          | 466 |
| NP_984945.2    | KAPAGLDQSRIPHSEKRLKFTNRFLESPFHSLLLEPALELIKQDLHDADLEFKQESLA             | 455 |
| NP_012739.1    | KAPSGLDQSRIPFSEKRLKFSNRFLPVASFHSHLLVPASDLINKDLVKNVSNFNAKDIQ            | 456 |
| XP_451653.1    | KAPAGLDQARIPFSEKRLKFFNRFLPVSPFHSLLLEPANALIEHDLAAAGVEFQASDLK            | 456 |
|                | ** * : * * * : : * * * : * * * : * * * * . : : . * * : . : :           |     |
| NP_594370.1    | VPVYSTDDAGDLRFEQPSKLLLALAVMITEKVVHWEACGFPDVTHIIDFGPGGISGVGS            | 507 |
| XP_003719712.1 | IPVFDHTGKDIRREEVGNIVPTLIRLITRDPVHWEKATVFPGATHVLDLDFGPGGISGLGI          | 526 |
| XP_962465.1    | MPVYNTFTGKDLREEVEGNIVPSLIRMITGETVHWEKATVFDATHILDGPGGISGLGI             | 526 |
| NP_984945.2    | IAVYDITYDGHDLRQH-SGSIVERIASCITKLPVYMETATTFK-STHILDYGGPGASGLGV          | 513 |
| NP_012739.1    | IPVYDITFDGSDLRVL-SGSISERIVDCIIRLPVKWETTTFK-ATHILDGPGGASGLGV            | 514 |
| XP_451653.1    | IPVYDITFNGKDLRES-KEPIASRITYCITSLPVNWEESTKFN-ATHILDGPGGASGLGV           | 514 |
|                | : * : * . * : * : : * * * : * * * : * * * : * * * : * * * : * * * :    |     |
| NP_594370.1    | LTRANKDGGQVRVIVADSFES---LDMGAKFEIFDRDA-KSIEFAPNWKLYSPKLVKNK            | 563 |
| XP_003719712.1 | LTSRNKDGTVRVILAGSVAGTV-TEVGYPKPELFDREEHAVKYAIDWVKEYGPKLIKTA            | 585 |
| XP_962465.1    | LTSRNKEGTGVRVILAGTVNGTV-TDVGYPKPELFDREEQAVKFAVNWVKEYGPRLVKNS           | 585 |
| NP_984945.2    | LTHRNKDGTVRVIIAGALDHNIDDEYGFQKQLFDVNP-TSLKFASNWLEEFHPKLIKTG            | 572 |
| NP_012739.1    | LTHRNKDGTVRVIVAGTLDINPDDDYGFQKQIFDVTS-NGLKKNPNWLEEYHPKLIKTK            | 573 |
| XP_451653.1    | LTHRNKDGTVRVIIAGALDTPDDEYGFQKQLFDVTS-SGLKFSVNWLEQFHPKLVKTK             | 573 |
|                | ** * : * * * * : : : : * * * * : : : : * * * * : : * * * * :           |     |
| NP_594370.1    | LGRVYVDTLSRMLGLPPLWVAGMPTSPVWQFCSAIAKAGFTYELAGGGYFDPKMMREA             | 623 |
| XP_003719712.1 | TGRTYVDTKMSRLLGLPPLVWVAGMPTCTVKWDFVAATMNAGYHIELAGGGYFEPRMMDA           | 645 |
| XP_962465.1    | VGRTYVDTKMSRLLGLPPLVWVAGMPTTVPWDFIAATMNAGYQIELAGGGYFNAKMTTEA           | 645 |
| NP_984945.2    | SGKVYVDTKFSRLLGRPPLVPGMPTTVSPDFVAATINSYGYHIELAGGGYFSPQGMTEA            | 632 |
| NP_012739.1    | SGKIFVETKFSKLIIGRPPLVPGMPTCTVSPDFVAATTNAGYHIELAGGGYFSAAGMTAA           | 633 |
| XP_451653.1    | AGKIYVDTTFSKLLGRAPLLVPGMPTTVSPDFVAATINAGYHIELAGGGYFTAEGMTKA            | 633 |
|                | * : : * * : * : * * : * * * * : * : * : * : * : * * * * : * * * :      |     |
| NP_594370.1    | IHKLSLNIPPGAGICVNVIIYINPRTYAWQIPLIRDMVAEGYPIRGVTIAAGIPSLEVANE          | 683 |
| XP_003719712.1 | LVKIEKAIPAGRGISVNLIIYVNPAMQWQIPLIGRLRSQGVPIEGLTIGAGVPSIEVANE           | 705 |
| XP_962465.1    | ISKIEKAVPAGRGICVNLIIYVNPAMGWQIPLIGRLRAEGYPIEGLTIGAGVPSIEVAQE           | 705 |
| NP_984945.2    | IDSVVAQIKKGSSLGINLIYVNPMLQWGIPLIKELRSKGYPIQSLTIGAGVPSLEVASE            | 692 |
| NP_012739.1    | IDSVVSQIEKGSTFGINLIYVNPFLQWGIPLIKELRSKGYPIQFLTIGAGVPSLEVASE            | 693 |
| XP_451653.1    | IEDVISKIKKGYGLGINMLIYVNPMLQWGIPIKELREKGYPIQALTIAGAVPSIDVATE            | 693 |
|                | : . : : * : : * : * * * * * * * * : : * * * . : * * * * : * * * :      |     |

|                |                                                                 |      |
|----------------|-----------------------------------------------------------------|------|
| NP_594370.1    | LISTLGVQYLCLKPGSV EAVNAVISIAKANPTFPPIVLQWTGGRAGGHHSFEDFHSPILLT  | 743  |
| XP_003719712.1 | YIQTLLGLKHISFKPGSTDAIQAVINIANANPTFPVMLQWTGGRGGGHHSFEDFHQPVLML   | 765  |
| XP_962465.1    | YIETLGLKHISFKPGSGEAIQAVINIAKANPTFPVILQWTGGRGGGHHSFEDFHHPILNL    | 765  |
| NP_984945.2    | YIETLGMTHLGLKPGSVD AISQVITIAKAHPTFPPIVVQWTAGRGGGHHSFENFHAPMLQM  | 752  |
| NP_012739.1    | YIETLGLKYLGLKPGSIDAISQVINIAKAHPNFPIALQWTGGRGGGHHSFEDAHTPMLQM    | 753  |
| XP_451653.1    | YIETLGLTHLGLKPGSIDAISQVIAIAKAHPTFPPIVMQWTGGRGGGHHSFEDFHAPILQM   | 753  |
|                | *.***: : :**** :*:. ** **:*:*.*: :***.*.*****: * *:*            |      |
|                |                                                                 |      |
| NP_594370.1    | YSAIRRCDNIVLIAGSGFGGADDEPYLTGEWSAAFKLPPMPFDGILFGSRLMVAKEAHT     | 803  |
| XP_003719712.1 | YNRIRKCDNLIL IAGSGFGGAEDTYPYITGEWSRKFYGYPPMPFDGCLFGSRVMVAKEAHT  | 825  |
| XP_962465.1    | YGRIRRQENIILVAGSGFGGADDTYPYLTGDWSIKYGYPPMPFDGCMFGSRMMVAKEAHT    | 825  |
| NP_984945.2    | YGKLRHSNIIL IAGSGFGSS EETYPYLTGEWSTRFNYPPMPFDGFLFGSRVMVAKEAKT   | 812  |
| NP_012739.1    | YSKIRRHPIMLIFGSGFGSADDTYPYLTGEWSTKFDYPPMPFDGFLFGSRVMIKVEKT      | 813  |
| XP_451653.1    | YAKIRRHNIYLIAGSGFGSAEDTYPYLTGEWSTKFNYPMPFDGFLFGSRVMIKAKETK      | 813  |
|                | * :*: * : * :*****: :* **:*:*:* : ***** :****:*:*:*.*           |      |
|                |                                                                 |      |
| NP_594370.1    | S LAAKEAIVAAKGVDDSEWEKTYDGP TGGIVTVLSELGEPHKLATRGIMFWKELDDTIF   | 863  |
| XP_003719712.1 | APA AKQAIVDAPGVDDDEWEKTYNGVAGGITTVLSEMGEPHKLATRGVKFWSEMDQKIF    | 885  |
| XP_962465.1    | S LAAKQAIVDAPGLDDSDWEKTYKGPAGGVITVRSEMGEPHKLATRGVRFWAEMDQKIF    | 885  |
| NP_984945.2    | S LAAKKAIAACTGVPDELWEQTYKKPTGGIVTVRSEMGEPHKLATRGVMLWKELD ETIF   | 872  |
| NP_012739.1    | SPDAKKCIAACTGVPDDKWEQTYKKPTGGIVTVRSEMGEPHKLATRGVMLWKEFDE TIF    | 873  |
| XP_451653.1    | SPATKKTIAECGVPDSQWEQTYKKPTGGIITVRSEMGEPHKLATRGVMLWKEMDDTIF      | 873  |
|                | : :*: * . . * : * . **:* . :*: ** **:******:****: .* *:*.*      |      |
|                |                                                                 |      |
| NP_594370.1    | SLPRPKRLPALLAKKQYIIKRLNDDFQKVYFPAHIVEQVSPEKFKFEAVDSVEDMTYAE L   | 923  |
| XP_003719712.1 | SLPK EKRVPELKKMRSYII EKLNKDFHKVWF GKNKAGQ-----AVDLEDMTYAEV      | 935  |
| XP_962465.1    | SLPK EKRVAA LKASRDYII EKLNKDFQKVWF GQNKEGK-----AVDLEDMTYAEI     | 935  |
| NP_984945.2    | NLPKNKLQPALDAKRDI IQKLN SDFQKPFAT-VNGE-----AREL TDMTYKEV        | 921  |
| NP_012739.1    | NLPKNKLVPTLEAKRDI IISRLNADFQKPFAT-VNGQ-----ARDLATMTYEEV         | 922  |
| XP_451653.1    | SLPKNKLQAALDAKKDYIISKLNADYQKPFAT-VNGE-----ARDLADMTYEEV          | 922  |
|                | .*: * * * :.***:***:*:* : * : : : : . . : *** * :               |      |
|                |                                                                 |      |
| NP_594370.1    | LYRAIDL MYVTK EKRWIDVTLRTFTGKLMRRIEERFTQDVGKTTLIENFEDLN DPYPVAA | 983  |
| XP_003719712.1 | VRRMVELMYVKHESRWIDPSFMRLTGDFIHRVEERFVQSSGQPSLLQHYTDLTQPFETIE    | 995  |
| XP_962465.1    | VRRLV LLYVKDEARWIDQSYTKLTGDFIHRIEERFTTTPGQPSRLQSYADLKEPYSAVE    | 995  |
| NP_984945.2    | AERMVELMFIKSTGKWIDVTLRNFTGDFLRRVEERFTKDK-SVSVLQSYSDLETPSKVLA    | 980  |
| NP_012739.1    | AKRLVELMFIIRSTNSWFDVTRFTGDFLRRVEERFTKSK-TLSLIQSYSLDLPDEAIE      | 981  |
| XP_451653.1    | AKRMVELMYIRSTNSWIDF TLRNFTGDFLRRVEERFTKQK-TVSI IQNFVLEPEKALE    | 981  |
|                | * :*: : : * : * : : :*: :*: :* : : : : * * .                    |      |
|                |                                                                 |      |
| NP_594370.1    | RFLDAYPEASTQDLNTQDAQFFYSLCSNPFQKPVFIPAIDDTFFYFKKDSLWQSEDLA      | 1043 |
| XP_003719712.1 | KILAHYPQAEDQLINAQDVQHFLQLCMRPIQKPVVFPALDDNDFYFKKDSLWQSEDLQ      | 1055 |
| XP_962465.1    | QILSHYPEAEKQLINAQDVQHFLLLCQRRGQKPVTFVPVLDENFEFFFKKDSLWQSEDLA    | 1055 |
| NP_984945.2    | DIFSAYPAAKSQFVNAQDVAYFLECAQRPTQKPVFIPVLDHRFEFFFKKDSLWQSENLE     | 1040 |
| NP_012739.1    | KVFNAYPAAREQFLNAQDIDHFLSMCQNPQKPVFVPVLDRRFEIFFFKKDSLWQSEHLE     | 1041 |
| XP_451653.1    | KVFDAYPAAKEQFLNAQDIDYFLTLCQRPTQKPVFVPVLDLRRFEFFFKKDSLWQSEHLE    | 1041 |
|                | .: ** * * :*:** . * . . ***** *.*:* * :*:*****.*                |      |



|                |                                                               |      |
|----------------|---------------------------------------------------------------|------|
| NP_594370.1    | AVVGEDVGRVAILQGPMAAKHSTKVNPEAKELLDGINETHIQHFIKKFFYAGDEKKIPIVE | 1103 |
| XP_003719712.1 | AVMDQDVQRTCILQGPMVRYSTVVDPEIQSILDGVHEGHIAGLSKDLVQGGTSTLPSIE   | 1115 |
| XP_962465.1    | AVVGKDVGRTCILQGPMAAKHATKVDPEIKDILDGIHNGHIALLTRDMYGGDES KIPTIE | 1115 |
| NP_984945.2    | AVVDEDVQRTCILHGPVAAQYTKETINEPIQHILDSIHDGHIKLLKDYYSDDIS KVPVVE | 1100 |
| NP_012739.1    | AVVDQDVQRTCILHGPVAAQFTKVIDEPIKSIMDGIHDGHIKLLHQYYGDDDES KIPAVE | 1101 |
| XP_451653.1    | AVVDQDVQRTCILHGPVAAQFTNQVDQPIKSILDDVHEGHIKMLLKDYNNDDSKIPVVE   | 1101 |
|                | **::** *..**:*:*..:.. ::* : :*:..: ** : : * .. :* :*          |      |
| NP_594370.1    | YFGGVPPVNVSHK--SLESVSVTEEAGSKVYKLP EIGSNSALPSKKLWFELLAGPEYTWf | 1161 |
| XP_003719712.1 | YFGGKLMEREFDPVDSIDGLSVSEERGVDRIDFRISLSPSQTMPSTDHWSLIAGPTRSWR  | 1175 |
| XP_962465.1    | YFGGKLI ESEIPL--DIEGLTVSYD-EHKNTYRLSSSPSVQLPSLDAWLSLLAGHQRNWR | 1172 |
| NP_984945.2    | YFGGENPREVDYPTV-----KKTPDTIVYNATS-----ATDFRTWFNVLAGSQKSWR     | 1147 |
| NP_012739.1    | YFGGESPVVQSQVDS-----SSVSEDSAVFKATS-----STDEESWFKALAGSEINWR    | 1150 |
| XP_451653.1    | YFGGEEPEKVAFDS-----IESGNKATYQASS-----STDSSKWFKLLAGEEKTWR      | 1147 |
|                | **** . *.. :** .*                                             |      |
| NP_594370.1    | RAIFTTQRVAKGWKLEHNPVRRIFAPRYGQRAVVKGD--NDTVVELYETQSG-NYVLA    | 1218 |
| XP_003719712.1 | HALLMSEVIVQGTQKFSNPMRRIFAPRGLFVVRYPKDPASTQIIVREQPRHNHYVDVL    | 1235 |
| XP_962465.1    | FALLQSDVLVQGGKYQTNPMRRIFAPARGLFVEILHPNPEKTVILVKEQPRPNRYAEVI   | 1232 |
| NP_984945.2    | HAFFSIPRVVQGSRYSENPTFKVFKPCDNMVTIKHPETPKTEVILQEPVQG-TLKT      | 1206 |
| NP_012739.1    | HASF LCSFITQDKMFVSNPIRKVFKPSQGMVVVISNGNTSSKTVVTLSEPVQG-ELKPTV | 1209 |
| XP_451653.1    | SAFFSTPRIVQDSLLIENPARKVFKPSDNMVVQIENAKDSAKTVVTLLETVQG-ELKPTA  | 1206 |
|                | * : : : . ** :* * . : . * : : *                               |      |
| NP_594370.1    | RLSY-DGETIVVSMFENRNALKKEVHLDLFLKYEPSAGYSPVSEILDRNDRIKHFYWAL   | 1277 |
| XP_003719712.1 | VARLSGKNEIIVELIKDITTAGKPVSLPLKFYKPEAGYAPLHEVMDDRNDRIKEFYWRA   | 1295 |
| XP_962465.1    | EVKLDGKNEIVVNMIKDITTAGKPVPLTLKFYINPEAGYAPIHEVMGDRNDRIKEFYWRA  | 1292 |
| NP_984945.2    | TVTF-SGDVIQLSMIENRTMDGIPVALPLLYKYNPTDGFAPIVEIMEDRNQRIKEMYWKL  | 1265 |
| NP_012739.1    | ILKLLKENIIQMEMIENRTMDGKPVSLPLLYNFNPDNGFAPISEVMEDRNQRIKEMYWKL  | 1269 |
| XP_451653.1    | ILRLVKDTLIQLDLIENRTIDGSPVSLPLLFYNTEDGFAPIAEVTKGRNSRIKEMYWKL   | 1266 |
|                | * : : : . * * : : : * : * : * ..**..**..**                    |      |
| NP_594370.1    | WFGEEPYPENASITDTFTGPEVTVTGNMIEDFCRTVGNHNEAYTKRAIRKRMAPMDFAI   | 1337 |
| XP_003719712.1 | WFGDEKLELDANVDSAFDGGKDVVTS EAINDFVHAVGNTGEAFVDRPGKVMYAPMDFAI  | 1355 |
| XP_962465.1    | WFGDEKLDLSSVHEVFDGGKTTITSEAINDFVHAVGNTGEAFVDRPKVMYAPMDFAI     | 1352 |
| NP_984945.2    | WLK-DPFNLDFDPRDPIESDFITTSKDIAAFTHAIGNCEDFVTRPGRPLAPMDFAI      | 1324 |
| NP_012739.1    | WID-EPFNLD FPRDVIKGD F EITAKEVYDFTHAVGNCEDFVSRPDR TMLAPMDFAI  | 1328 |
| XP_451653.1    | WLD-EPFNLD FPRSVIKGGDF TISAKDISEFVHAIGNCEDFVARSGREMLAPMDFAI   | 1325 |
|                | *: : : . . : . . : : : * : : * * * : . * : *****              |      |
| NP_594370.1    | VGWQAITKAIFPKAIDGDLRLVHLSMSFRMV-GSHSLMEGDKVTTASIIAILNNDSGK    | 1396 |
| XP_003719712.1 | VGWKAITKPIFPRKIDGDLNLVHLSNQFRMKPGA EPLKKGDEVSTVSRVNAVVIQESGK  | 1415 |
| XP_962465.1    | VGWKAITKPIFPRIDGDLKLVLHLSNQFRMMPGA EPLKKGDVVSTTAQINAVINQESGK  | 1412 |
| NP_984945.2    | IGWRALVKAIFPNVVDGDLNLVHLSMSYRMIPGAKPLQENDVVNVSALIKSVVNQENGK   | 1384 |
| NP_012739.1    | VGWRAIIKAIFPNTVDGDLKLVLHLSNGYKMIPGAKPLQVGDVVSTTAVIESVVNQPTGK  | 1388 |
| XP_451653.1    | VGWRVIVKAIFPNAVDGDLKLVLHLSNGYRMIPGATPLKEGDTISTSAVIKSVVNQPNGK  | 1385 |
|                | .**::* * **..:*****.***.** :* * : * . * .. : : : : .**        |      |

|                |                                                                                     |      |
|----------------|-------------------------------------------------------------------------------------|------|
| NP_594370.1    | TVTVKGTVYRDGKEVIEVISRFLYRGTDFDFENTF EHTQETPMQLTLATPKDVAVLQSKS                       | 1456 |
| XP_003719712.1 | MVEVCGTITRDGEPVMEVTSQFLYRGTYDFDFENTFQSKIETPMQIHLATSKDVAVLR SKE                      | 1475 |
| XP_962465.1    | MVEVCGTITRDGKVMMEVTSQFLYRGTYDFDFENTFQRKVETPMQLHLATSKDVAVLR SKD                      | 1472 |
| NP_984945.2    | LVEVVGTIKKSGKPVIEVTTSFLYRGKYSDFENTFQKSTDPVYVIQINSPKDIAVLR SKE                       | 1444 |
| NP_012739.1    | IVDVVGTLSRNGKPMMEVTSFFYRGNYSDFENTFQKTVEPVYQMHKTSKDIAVLR SKE                         | 1448 |
| XP_451653.1    | IVEVIGTLTRDDKPMMEVTSFFYRGTYADYENTFEKTVEPIYQIEVKSSKDSAVLR SKE                        | 1445 |
|                | * * * * : : . . : * : * * : * : * * : : * : * * : . : : : * * * * : * *             |      |
| NP_594370.1    | WFQLLD---PSQDLGSILTFRLNSYVRFKDKVKSSVETKGIVLSELPSKAIIVASVD                           | 1513 |
| XP_003719712.1 | WFTLEDN--VNMDLLGQTLIFRLQSLVRFKNTTVFSSVQTRGEVLVELPTKEIVQVGSVE                        | 1533 |
| XP_962465.1    | WFMDDVENPDIELLGQTLFRLQTLVRFKNTVFSHVETQGGVLLLELPTKEIIVQVATVN                         | 1532 |
| NP_984945.2    | WLHFDN---DKIDLLGRLLTFETETEVTFKNRVTFSSVHCEGRVLMELSTKENVQIGVVK                        | 1501 |
| NP_012739.1    | WFQLDD---EDFDLLNKTLTFETETEVTFKNaNIFSSVKCFGPIKVELPTKETVEIGIVD                        | 1505 |
| XP_451653.1    | WFQLDD---EEDLLGKTLTFETETEVTFKNASVFSVKCQGIKLMELPTKETVEIGSVD                          | 1502 |
|                | * : : : . : * . * * . : : * * * : : * * . * : * * : * : : * . *                     |      |
| NP_594370.1    | FQSVDCHGPNVIEFLKRNGKPIEQPVEFENGGYSVIQVMDGYSVPVFTPTNSPYAEVS                          | 1573 |
| XP_003719712.1 | YEAGTSHGNPVIDFLERNSSIEQPINFENPIPLSGKT-----PLQLRAPASNETYARVS                         | 1588 |
| XP_962465.1    | YYAGESHGNPVIDYLQRHGSSIEQPINFENPIPLSGKT-----PLQLKAPSSNETYARVS                        | 1587 |
| NP_984945.2    | YDAGESHGNPVIDYLSRNGSTLEHKVNLENTIPIAT-----IEAQSPGTNETYARVS                           | 1553 |
| NP_012739.1    | YEAGASHGNPVVDFLKRNGSTLEQKVNLENTIPIAV-----LDSYTPSTNEPYARVS                           | 1557 |
| XP_451653.1    | YEAGESHGNPVIDYLSRNGSTLEQKVNLENAPIAV-----RDTQSPSTNEPYARVS                            | 1554 |
|                | : : . * * * * : : * : * . : * : : * * * : : * : * . * * : * * *                     |      |
| NP_594370.1    | GDYNPIHVSPTFAAFVELPGTHGITHGMYTSAARFRVETYAAQNVPERVKHYEVTFVNM                         | 1633 |
| XP_003719712.1 | GDYNPIHVS RVFANYADLPGT--ITHGMYSSAAVRSLVETWAAENDNSRVR SFHASLVGM                      | 1646 |
| XP_962465.1    | GDYNPIHVS RVFSSYANLPGT--ITHGMYSSAAVRSLVETWAAENKVGRRV SFHASLTGM                      | 1645 |
| NP_984945.2    | GDLNPIHVS RHFANYADLPGT--ITHGMYTSGAVRALVETWAA DSVSSRVRAYSCQFVGM                      | 1611 |
| NP_012739.1    | GDLNPIHVS RHFASYANLPGT--ITHGMFSSASVRALIENWAA DSVSSRVRGYTCQFVDM                      | 1615 |
| XP_451653.1    | GDLNPIHVS RHFAYANLPGT--ITHGMYSSATVRALVETWAA DNVSSRVRAYNCQFVGM                       | 1612 |
|                | * * * * * * * * : : : * * * * * * * * : : * * * * * * * * : : * * * * * * *         |      |
| NP_594370.1    | VLPNTEELITKLSHTGMINGRKKIIVKVEVLNQETSEPVLVGTAEEVQPVSAVYFTGQGSQEQ                     | 1693 |
| XP_003719712.1 | VLPNDLLVKLQHVGMVAGRKKIIVKVEVINKETEDKVLVGEAEVQPVTA VYFTGQGSQEQ                       | 1706 |
| XP_962465.1    | VLPNDINVKLQHVGMVAGRKKIIVKVEASNKETEELVLLGEAEIEQPITAYIFTGQGSQEQ                       | 1705 |
| NP_984945.2    | VLPNTLLTTRIEHVGMINGRKKLIKFEETRND-KDEPVLAGEAEVQPVSTFVFTGQGSQEQ                       | 1670 |
| NP_012739.1    | VLPNTALKTSIQHVGMINGRKKLIKFEETRNE-DDVVVLTGEAEIEQPVTTFVFTGQGSQEQ                      | 1674 |
| XP_451653.1    | VLPNTPLQTTIQHVGMINGRKKLIQFETKND-ADETVMTGEAEVQPVSTFVFTGQGSQEQ                        | 1671 |
|                | * * * * : : . : * * * * : * * * * * * * * : : * * * * * * * * : : * * * * * * *     |      |
| NP_594370.1    | GMGMDLYASSPVARKIWD SADKHFLTNYGFSIIDIVKHNPHSITIHFGGSGKKIRDNYM                        | 1753 |
| XP_003719712.1 | GMGMELYESSVPAKEVWDRADKYLMDTYGFAITNIVKNNPKELTIHFGGPRGKAIRANYM                        | 1766 |
| XP_962465.1    | GMGMDLYNSSPVAKAVWDRADKYLMDTYGFAITNIVRNNPKELTIHFGGPRGKAIRQNYM                        | 1765 |
| NP_984945.2    | GMGMDLYDKSPVARQVWDRADNHFKQTYGFSILEIVRTNPKELTIYFGGEGKRKIKENYNT                       | 1730 |
| NP_012739.1    | GMGMDLYKTSKAAQDVWNRADNHFKDQTYGFSILDIVINNPVNLTIHFGGEGKRKIRENYS                       | 1734 |
| XP_451653.1    | GMGMDLYAKSDVAKQVWDRADQHFKSTYGFSILDIVKNNPTELTIYFGGEGKRKIKENYNT                       | 1731 |
|                | * * * * : * * * * * * * * : : * * * * * * * * : : * * * * * * * * : : * * * * * * * |      |

|                |                                                                |      |
|----------------|----------------------------------------------------------------|------|
| NP_594370.1    | AMAYEKLMEDEGTSKVVPVFETITKDSTSFSTHPSGLLSATQFTQPALTLMEKSAFEDMR   | 1813 |
| XP_003719712.1 | AMTFETVAADGTIKSERIFKIDINERTTSYTYRSPTGLLSATQFTQPALTLMEKASFEDMK  | 1826 |
| XP_962465.1    | SMTFETVAADGSIKSERMFKEIDEKTTSTYTYRSPNGLLSATQFTQPALTLMEKASFEDMK  | 1825 |
| NP_984945.2    | SMIFETI-VDGEIASERIFKSITESSTSYTFKSDTGLLSATQFTQPALTLMEKASFEDLK   | 1789 |
| NP_012739.1    | AMIFETI-VDGKLLKTEKIFKINEHSTSYTFRSEKGLLSATQFTQPALTLMEKAAFEDLK   | 1793 |
| XP_451653.1    | QMIFETI-VDGEVKSERIFKIDITEETNSFTFRSPTGLLSATQFTQPALTLMEKASFEDLK  | 1790 |
|                | * :*.: ** :*: * : :.***: .*****:****:.                         |      |
| NP_594370.1    | SKGLVQNDCAFAGHSLGEYSALSAMGDVLSIEALVDLVFLRGLTMQNAVHRDELGRSDYG   | 1873 |
| XP_003719712.1 | AKGLVPRDSTFAGHSLGEYSALAALADVMPIESLVSVVFYRGLTMQVAVERDASGRSNYS   | 1886 |
| XP_962465.1    | AKGLVPRDSTFAGHSLGEYSALAALADVMPIESLVSVVFYRGLTMQVAVERDETGRSNYG   | 1885 |
| NP_984945.2    | SKGLIPAEATFAGHSLGEYAALASLADVMSIESLVEVVFYRGMTMQVAVPRDSEGRSNYG   | 1849 |
| NP_012739.1    | SKGLIPADATFAGHSLGEYAALASLADVMSIESLVEVVFYRGMTMQVAVPRDELGRSNYG   | 1853 |
| XP_451653.1    | SKGLIPAEATFAGHSLGEYAALASLADVMSIESLVEVVFYRGMTMQVAVPRDELGRSNYG   | 1850 |
|                | :***: :.:*****:****:..**:*:*:*:*:*:*:*:*:*:*:*:*:*:*:*:        |      |
| NP_594370.1    | MVAANPSRVSAFSDAALRFIVDHIQQTNLLLIEVNYNVENQQYVVSGLNLSLSTLGHV     | 1933 |
| XP_003719712.1 | MCAVNPSRISKTFNEEALRFVVGNIAGTGWLLEIVNYNIANMQYVCAGDLRALDRLTNV    | 1946 |
| XP_962465.1    | MCAVNPSRINKTFTEEALRFVVGSIAGTGWLLEIVNFVNIANMQYVCAGDLRALDLGGV    | 1945 |
| NP_984945.2    | MIAVNPSRVSTGFTQEQALQFVVERVVKITEWLVIVNYNVEDQQYVVAAGDLRALDRLTNV  | 1909 |
| NP_012739.1    | MIAINPGRVAASFQEQALQYVVERVVKRTGWLVIVNYNVENQQYVVAAGDLRALDRLTNV   | 1913 |
| XP_451653.1    | MIAVNPSRVSPFQEQALEFVVKIVDKKTGWLLEIVNYNVENQQYVVAAGDLRALDRLTNV   | 1910 |
|                | * * **.*: *.:**:*:* : : * *.****:*. : *** :*:* :*:* : *        |      |
| NP_594370.1    | LNFLKVQKIDFEKLEKLTIEQLKEQLTDIVEACHAKTLEQQKKTGRIELERGYATIPLK    | 1993 |
| XP_003719712.1 | LNFLKAQKIDIEAMKAAMTVEDVQHLQEIIEKASAEKTE---AKPKPLELERGFATIPLR   | 2003 |
| XP_962465.1    | CNAIKMMKIDIEKMRKESAEVKEQLVEIIEKSCANDTQ---AKPTPLVLRGFATIPLP     | 2002 |
| NP_984945.2    | LNFLVQKIDLVKQLQATMPLEQVEEHLDEIIEISKKSL---SKPQPIELERGFACIPLR    | 1966 |
| NP_012739.1    | LNFIKQKIDIEELQKSLSEEEVEGHLFEIIEASKKSA---VKPRPLKLERGFACIPLV     | 1970 |
| XP_451653.1    | LNFLVQKIDIAKLQETLSLEEVESHLEIIEISKKST---AKPQPIELERGFACIPLR      | 1967 |
|                | * :* ***: :. * : : * :*: :. : * : : * :***:***                 |      |
| NP_594370.1    | -IDVPFHSSFLRGGVRFREYLVKKIFPHQINVAKLRGKYPNLTAKPFEISKEYFQNVY     | 2052 |
| XP_003719712.1 | GIDVPFHSTFLRSGVKPFRSFLKKINKTTIDPSKLLGKYIPNVTAKPFALTKEYFEDVY    | 2063 |
| XP_962465.1    | GIDVPFHSTFLRSGVKPFRSFLKKINKTTIDPSKLLIGKYIPNVTAKPFAITKEYFEDVY   | 2062 |
| NP_984945.2    | GISVPFHSSYLNRNGVKPFKNFLKKNIIKENVKVDRLLIGKYIPNLTAKPFAITKEYFEDVY | 2026 |
| NP_012739.1    | GISVPFHSTYLMNGVKPFKSFLKKNIIKENVKVARLAGKYIPNLTAKPFQVTKEYFQDVY   | 2030 |
| XP_451653.1    | GISVPFHSSYLNRNGVKPFKNFLMKNVTKENVKADRLIGKYIPNLTAKPFEITKEYFQDVY  | 2027 |
|                | *.*****:* **:*:*:* :. : * *****:***** :****:.*                 |      |
| NP_594370.1    | DLTGSRIKKILQNWDEYESS-----                                      | 2073 |
| XP_003719712.1 | RLTNSPRIASILANWEQYQENAVPSTIGLGANGAGDANGETTENGVEEANGANGVH       | 2120 |
| XP_962465.1    | RLTNSPKIQQILANWDKYQEEGVSGIP-----DAE-----                       | 2092 |
| NP_984945.2    | KLTGSEKIKAVLDNWEYSQN-----                                      | 2046 |
| NP_012739.1    | DLTGSEPIKEIIDNWEKYEQS-----                                     | 2051 |
| XP_451653.1    | ELTGSEKIKILDNWEKITN-----                                       | 2047 |
|                | **.* * :.***:.                                                 |      |

**Figure S2.** Multiple sequence alignment of 5 homologous of Ascomycota (FAS1 *Saccharomyces cerevisiae*, uncharacterized protein *Kluyveromyces lactis*, AER085Cp *Eremothecium gossypii*, FAS1 *Schizosaccharomyces pombe*, and FAS1 *Neurospora crassa*, FAS1 *Magnaporthe oryzae*).

**Table S2.** Table to show ascomycetes fungus strain, phylum, substrate, host and country which are closely related to *Magnaporthe oryzae* S6 Malaysian strain. The colour dot indicated for each species can be matched with phylogenetic (Figure 3) to recognized the position of particular ascomycetes in the phylogenetic tree using the information in NCBI and fungal related journals [29-32].

| Gene                                                  | Colour in Phylogenetic                                                              | Species                                      | Strain     | Phylum      | Substrate                                               | Type of host             | Country                        | Accession No   | Percentage Identity (%) |
|-------------------------------------------------------|-------------------------------------------------------------------------------------|----------------------------------------------|------------|-------------|---------------------------------------------------------|--------------------------|--------------------------------|----------------|-------------------------|
| Fatty acid synthase beta subunit dehydratase          |    | <i>Magnaporthe oryzae</i> S6                 | S6         | Ascomycetes | —                                                       | Paddy                    | Malaysia                       | —              | 100.00                  |
| Fatty acid synthase beta subunit dehydratase          |    | <i>Pyricularia oryzae</i> 70-15 [37,47,49]   | 70-15      | Ascomycetes | —                                                       | Paddy, Wheat, Millet     | Asia, South America            | XP_003719712.1 | 100.00                  |
| Fatty acid synthase beta subunit dehydratase          |    | <i>Pyricularia oryzae</i> Y34                | Y34        | Ascomycetes | <i>Oryza sativa</i> L. ssp. <i>indica</i>               | Paddy                    | Yunnan, China                  | ELQ41749.1     | 99.88                   |
| Hypothetical protein PspLS_06761                      |   | <i>Pyricularia</i> sp. CBS 133598            | NI919      | Ascomycetes | <i>Leersia oryzoides</i>                                | Rice cutgrass            | Chiba, Japan                   | TLD23790.1     | 98.73                   |
| Uncharacterized PgNI_06784                            |  | <i>Pyricularia grisea</i> [48]               | NI907      | Ascomycetes | <i>Digitaria sanguinalis</i> , <i>Eleusine coracana</i> | Crabgrass, Finger Millet | Tochigi, Japan, Eastern Africa | XP_030980725.1 | 98.50                   |
| Hypothetical protein PpBr36_04604                     |  | <i>Pyricularia pennisetigena</i>             | Br36       | Ascomycetes | <i>Cenchrus echinatus</i>                               |                          | Parana, Brazil                 | XP_029750409.1 | 98.27                   |
| Fatty acid synthase beta subunit dehydratase          |  | <i>Magnaportheopsis poae</i> ATCC 64411 [36] | ATCC 64411 | Ascomycetes | <i>Poa pratensis</i>                                    | Kentucky Bluegrass       | North America                  | KLU82571.1     | 86.46                   |
| Fatty acid synthase beta subunit dehydratase          |  | <i>Gaeumannomyces tritici</i> R3-111a-1      | R3-111a-1  | Ascomycetes | —                                                       | —                        | —                              | XP_009219081.1 | 86.17                   |
| Putative fatty acid synthase beta subunit dehydratase |  | <i>Phaeocremonium minimum</i> UCRPA7         | UCRP A7    | Ascomycetes | <i>Vitis vinifera</i> cv. <i>Thompson</i>               | Wood canker              | Fresno County, California      | XP_007917534.1 | 80.07                   |
| Malonyltransferase-like protein                       |  | <i>Coniella lustricola</i>                   | B22-T-1    | Ascomycetes | —                                                       | —                        | —                              | PSS00700.1     | 78.52                   |
| Putative fatty acid synthase beta subunit dehydratase |  | <i>Diaporthe ampelina</i>                    | DA912      | Ascomycetes | <i>Vitis vinifera</i>                                   | Wood from a vineyard     | Solano County, California      | KKY38508.1     | 79.02                   |

|                                               |                                                                                     |                                                    |                |                     |                    |               |                             |                        |       |
|-----------------------------------------------|-------------------------------------------------------------------------------------|----------------------------------------------------|----------------|---------------------|--------------------|---------------|-----------------------------|------------------------|-------|
| Chain elongation-2                            |    | <i>Diaporthe helianthi</i>                         | 7/96           | <i>Ascomy cetes</i> | —                  | —             | France                      | POS73<br>465.1         | 78.50 |
| Hypothetical protein VPNG_02967               |    | <i>Cytospora leucostoma</i>                        | VPNG<br>_02967 | <i>Ascomy cetes</i> | Peach              | Peach orchard | Shaanxi, China              | VPNG_02967             | 80.58 |
| Fatty acid synthase beta                      |    | <i>Valsa mali var. pyri</i>                        | SXYL1<br>34    | <i>Ascomy cetes</i> | Apple              | Apple orchard | Shaanxi, China              | KUI550<br>13.1         | 80.51 |
| Fatty acid synthase subunit beta              |    | <i>Valsa mali</i>                                  | 03-8           | <i>Ascomy cetes</i> | Apple              | Apple orchard | Shaanxi, China              | KUI681<br>40.1         | 80.38 |
| Hypothetical protein VMCG_05230               |    | <i>Valsa malicola</i>                              | 03-1           | <i>Ascomy cetes</i> | Apple              | Apple orchard | Shaanxi, China              | ROW5<br>693.1          | 80.54 |
| Hypothetical protein VSDG_02422               |    | <i>Valsa sordida</i>                               | YSFL           | <i>Ascomy cetes</i> | Poplar             | Poplar tree   | Shaanxi, China              | ROW0<br>2228.1         | 80.47 |
| Beta subunit of fatty acid synthetase         |    | <i>Coniochaeta pulveracea</i>                      | CAB68<br>3     | <i>Ascomy cetes</i> | <i>Acacia</i>      | Decaying wood | Northern Cape, South Africa | RKU48<br>976.1         | 78.94 |
| Beta subunit of fatty acid synthase           |   | <i>Coniochaeta lignaria</i><br>NRRL 30616          | NRRL<br>30616  | <i>Ascomy cetes</i> | —                  | —             | —                           | OIW28<br>344.1         | 80.57 |
| Fatty acid synthase beta subunit dehydratase  |  | <i>Neurospora crassa</i><br>OR74A                  | OR74A          | <i>Ascomy cetes</i> | —                  | —             | —                           | XP_011<br>394235.<br>1 | 99.86 |
| Malonyltransferase-like protein               |  | <i>Chaetomium thermophilum var. thermophilum</i>   | DSM<br>1495    | <i>Ascomy cetes</i> | —                  | —             | —                           | XP_006<br>694197.<br>1 | 77.86 |
| Fatty acid synthase subunit beta              |  | <i>Madurella mycetomatis</i>                       | mm55           | <i>Ascomy cetes</i> | <i>Homo sapien</i> | Human         | Khartoum, Sudan             | KXX77<br>519.1         | 79.34 |
| Uncharacterized protein MYCTH_2310228         |  | <i>Thermothelomyces thermophilus</i><br>ATCC 42464 | ATCC<br>42464  | <i>Ascomy cetes</i> | —                  | —             | —                           | XP_003<br>665953.<br>1 | 78.80 |
| Conserved hypothetical protein                |  | <i>Chaetomium globosum</i><br>CBS 148.51           | CBS<br>148.51  | <i>Ascomy cetes</i> | —                  | —             | —                           | XP_001<br>223166.<br>1 | 79.09 |
| Hypothetical protein M434DRAFT_37678          |  | <i>Hypoxylon sp.</i><br>CO27-5                     | CO27-<br>5     | <i>Ascomy cetes</i> | —                  | —             | —                           | OTA81<br>100.1         | 78.48 |
| Fatty acid synthase-like protein subunit beta |  | <i>Hypoxylon sp.</i><br>EC38                       | EC38           | <i>Ascomy cetes</i> | —                  | —             | —                           | OTA69<br>323.1         | 78.52 |

|                                              |  |                                                    |               |                     |                                                                         |                             |                                                                    |                        |       |
|----------------------------------------------|--|----------------------------------------------------|---------------|---------------------|-------------------------------------------------------------------------|-----------------------------|--------------------------------------------------------------------|------------------------|-------|
| Fatty acid synthase beta subunit dehydratase |  | <i>Grosmania clavigera</i><br>kw1407               | kw<br>1407    | <i>Ascomy cete</i>  | —                                                                       | —                           | —                                                                  | XP_014<br>17809.1      | 78.98 |
| Fatty acid synthase beta subunit dehydratase |  | <i>Sporothrix insectorum</i><br>RCEF 264           | RCEF<br>264   | <i>Ascomy cetes</i> | <i>Lepidopteran</i>                                                     | Larva                       | Qinghai,<br>China                                                  | OAA56<br>953.1         | 79.36 |
| Fatty acid synthase beta subunit dehydratase |  | <i>Ophiostoma piceae</i> UAMH<br>11346             | UAMH<br>11346 | <i>Ascomy cetes</i> | <i>Pinus contorta</i>                                                   | Lodgepole<br>pine           | British<br>Columbia<br>, Canada                                    | EPE035<br>82.1         | 78.51 |
| Fatty acid synthase subunit beta             |  | <i>Sporothrix brasiliensis</i><br>5110             | 5110          | <i>Ascomy cetes</i> | <i>Felis catus</i>                                                      | Cat                         | —                                                                  | KIH888<br>60.1         | 78.49 |
| Fatty acid synthase subunit beta             |  | <i>Sporothrix schenckii</i><br>1099-18             | 1099-<br>18   | <i>Ascomy cetes</i> | <i>Homo sapien</i>                                                      | Human                       | New<br>York,<br>USA                                                | XP_016<br>582851.<br>1 | 78.74 |
| Fatty acid synthase subunit beta             |  | <i>Colletotrichum sidae</i> CBS<br>518.97          | CBS<br>518.97 | <i>Ascomy cetes</i> | <i>Sida spinosa</i>                                                     | Flowering<br>plant          | Arkansas<br>, USA                                                  | TEA19<br>476.1         | 78.48 |
| Fatty acid synthase subunit beta             |  | <i>Colletotrichum orbiculare</i><br>MAFF<br>240422 | 104-T         | <i>Ascomy cetes</i> | <i>Cucumis sativus</i>                                                  | Cucumber<br>plant<br>leaves | Kyoto,<br>Japan                                                    | TDZ22<br>651.1         | 78.34 |
| Fatty acid synthase subunit beta             |  | <i>Colletotrichum trifolii</i>                     | 543-2         | <i>Ascomy cetes</i> | <i>Medicago sativa</i>                                                  | Alfalfa or<br>lucerne       | Chiba,<br>Japan                                                    | TDZ61<br>178.1         | 78.48 |
| Fatty acid synthase subunit beta             |  | <i>Colletotrichum spinosum</i>                     | CBS<br>515.97 | <i>Ascomy cetes</i> | <i>Xanthium spinosum</i>                                                | Flowering<br>plant          | New<br>South<br>Wales,<br>Australia                                | TDZ30<br>993.1         | 78.43 |
| Fatty acid synthase subunit beta 1           |  | <i>Colletotrichum chlorophyti</i>                  | NTL11         | <i>Ascomy cetes</i> | <i>Solanum lycopersicum</i>                                             | Tomato<br>plant             | Honshu,<br>Japan                                                   | OLN97<br>389.1         | 79.16 |
| Acyl transferase                             |  | <i>Colletotrichum salicis</i>                      | CBS<br>607.94 | <i>Ascomy cetes</i> | <i>Salix sp.</i>                                                        | Willows<br>leaf             | Netherlan<br>ds                                                    | KXH27<br>754.1         | 78.38 |
| Acyl transferase                             |  | <i>Colletotrichum fioriniae</i><br>PJ7             | PJ7           | <i>Ascomy cetes</i> | <i>Fragaria x ananassa</i>                                              | Strawberry                  | New<br>Zealand                                                     | EXF77<br>797.1         | 78.38 |
| Acyl transferase                             |  | <i>Colletotrichum orchidophilum</i>                | IMI<br>309357 | <i>Ascomy cetes</i> | <i>Phalaenopsis sp.</i>                                                 | Moth<br>orchid              | United<br>Kingdom                                                  | XP_022<br>468818.<br>1 | 78.24 |
| Acyl transferase                             |  | <i>Colletotrichum higginsianum</i><br>IMI 349063   | IMI<br>349063 | <i>Ascomy cetes</i> | <b><i>Brassica rapa</i></b><br><b>subsp.</b><br><b><i>chinensis</i></b> | —                           | <b>Trinidad</b><br><b>and</b><br><b>Tobago,</b><br><b>Trinidad</b> | XP_018<br>151290.<br>1 | 77.97 |

|                                                                 |   |                                          |            |                    |                                                   |                             |                            |                |       |
|-----------------------------------------------------------------|---|------------------------------------------|------------|--------------------|---------------------------------------------------|-----------------------------|----------------------------|----------------|-------|
| Fatty acid synthase subunit beta                                | ● | <i>Colletotrichum tanacetii</i>          | BRIP57314  | <i>Ascomycetes</i> | <i>Tanacetum cinerariifolium</i>                  | Flowering plant leaf        | Parkville, Australia       | TKW54859.1     | 77.93 |
| Acyl transferase domain-containing protein                      | ● | <i>Colletotrichum graminicola</i> M1.001 | M1.001     | <i>Ascomycetes</i> | —                                                 | —                           | —                          | XP_008095042.1 | 78.67 |
| Putative acyl transferase domain-containing protein             | ● | <i>Colletotrichum sublineola</i>         | TX430BB    | <i>Ascomycetes</i> | <i>Sorghum bicolor</i>                            | Great millet                | Texas, USA                 | KDN63499.1     | 78.35 |
| Fatty acid synthase beta subunit dehydratase (acyl transferase) | ● | <i>Colletotrichum tofieldiae</i>         | 0861       | <i>Ascomycetes</i> | <i>Arabidopsis thaliana</i>                       | Flowering weed              | Las Rozas, Spain           | KZL72973.1     | 78.14 |
| Fatty acid synthase beta subunit dehydratase, partial           | ● | <i>Colletotrichum incanum</i>            | MAFF238704 | <i>Ascomycetes</i> | <i>Raphanus sativus</i> L.                        | Radish                      | Miyazaki Prefecture, Japan | KZL80018       | 78.18 |
| Fatty acid synthase beta subunit dehydratase                    | ● | <i>Colletotrichum incanum</i>            | MAFF238712 | <i>Ascomycetes</i> | <i>Raphanus sativus</i> var. <i>longipinnatus</i> | Mild-flavored winter radish | Kagoshima, Japan           | OHW94742.1     | 78.18 |
| Probable fatty-acyl-CoA synthase                                | ● | <i>Rhynchosporium commune</i>            | UK7        | <i>Ascomycetes</i> | —                                                 | —                           | —                          | CZT04859.1     | 78.32 |
| Probable fatty-acyl-CoA synthase, beta subunit                  | ● | <i>Rhynchosporium secalis</i>            | 02CH4-6a.1 | <i>Ascomycetes</i> | —                                                 | —                           | —                          | CZT51067.1     | 78.22 |
|                                                                 | ● | <i>Rhynchosporium agropyri</i>           |            | <i>Ascomycetes</i> | —                                                 | —                           | —                          |                | 78.27 |
| Fatty acid synthase-like protein subunit beta                   | ● | <i>Cadophora</i> sp. DSE 1049            | DSE1049    | <i>Ascomycetes</i> | —                                                 | —                           | —                          | PVH81929.1     | 78.84 |
| Fatty acid synthase-like protein subunit beta                   | ● | <i>Phialocephala scopiformis</i>         | CBS120377  | <i>Ascomycetes</i> | —                                                 | —                           | —                          | XP_018068695.1 | 78.91 |
| Fatty acid synthase-like                                        | ● | <i>Hyaloscypha variabilis</i> F          | F          | <i>Ascomycetes</i> | —                                                 | —                           | —                          | PMD46531.1     | 78.02 |

|                                               |   |                                 |            |             |   |      |                            |                |       |
|-----------------------------------------------|---|---------------------------------|------------|-------------|---|------|----------------------------|----------------|-------|
| protein subunit beta                          |   |                                 |            |             |   |      |                            |                |       |
| Fatty acid synthase-like protein subunit beta | ● | <i>Coleophoma crateriformis</i> | BP579<br>6 | Ascomycetes | — | Leaf | Toyama-ken, Japan          | RDW6<br>4070.1 | 78.75 |
| Fatty acid synthase-like protein subunit beta | ● | <i>Coleophoma cylindrospora</i> | BP625<br>2 | Ascomycetes | — | Leaf | Nagasaki Prefecture, Japan | RDW7<br>7183.1 | 78.56 |

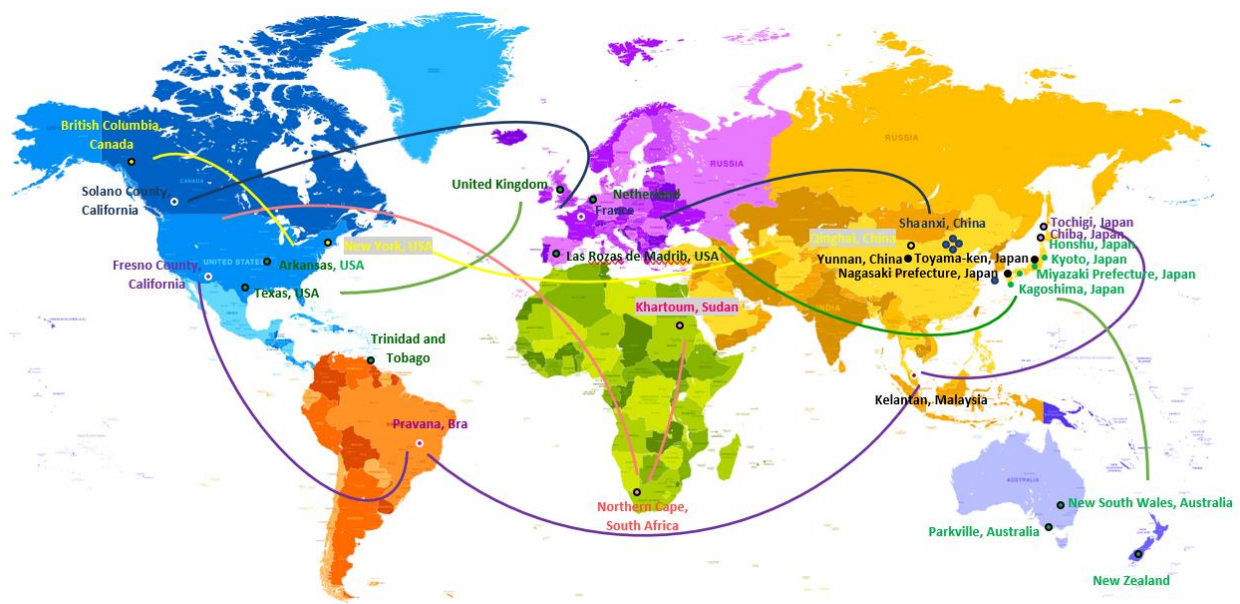

**Figure S3.** Geographical distribution of ascomycetes, which are closely related to *Magnaporthe oryzae* S6. The color dots in the phylogenetic tree (Figure 3) matches the color codes of their geographical location.



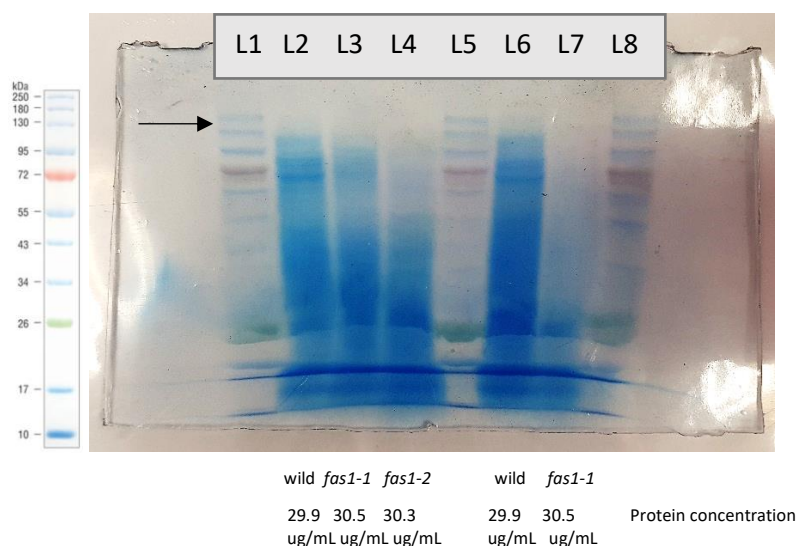

**Figure S4.** SDS-PAGE. A Lane 1,5,8: Color prestained protein standard, broad range; Lane 2 & 6: Protein extracted from *M. oryzae* S6 wildtype concentration 29.9 ug/mL ; Lane 3 & 7: Protein extracted from *fas1-1* concentration 30.5 ug/mL; Lane 4: Protein extracted from *fas1-1* concentration 30.3 ug/mL.

**Table S3.** (A) Diameter measurement of wildtype,  $\Delta fas1-1$  and  $\Delta fas1-2$  mutants of three biological replicates of each different carbon sources, 10 days culture under on complete media agar plates at temperature 26 ° C. (B) Average diameter and standard deviation of the replicates in Table S3A. (C) p-value of the diameter measurement of wildtype,  $\Delta fas1-1$  and  $\Delta fas1-2$  mutants of three biological replicates was determined by calculating the significant value using two way anova with replication.

A

| Wild Type     |                 |                 |                 |      |                    |
|---------------|-----------------|-----------------|-----------------|------|--------------------|
| Media         | 1 <sup>st</sup> | 2 <sup>nd</sup> | 3 <sup>rd</sup> | Mean | Standard Deviation |
| CM            | 7.90            | 8.30            | 7.90            | 8.03 | 0.23               |
| MM + G        | 7.10            | 7.00            | 7.00            | 7.03 | 0.06               |
| MM + OO       | 6.30            | 6.25            | 5.95            | 6.17 | 0.19               |
| MM + OA       | 5.30            | 5.20            | 4.80            | 5.10 | 0.26               |
| PDA           | 7.60            | 7.70            | 7.70            | 7.67 | 0.06               |
| MM + SA       | 0.40            | 0.40            | 0.40            | 0.40 | 0.00               |
| <i>fas1-1</i> |                 |                 |                 |      |                    |
| Media         | 1 <sup>st</sup> | 2 <sup>nd</sup> | 3 <sup>rd</sup> | Mean | Standard Deviation |
| CM            | 7.60            | 7.55            | 7.80            | 7.65 | 0.13               |
| MM + G        | 6.40            | 6.30            | 6.80            | 6.50 | 0.26               |
| MM + OO       | 5.70            | 5.60            | 5.30            | 5.53 | 0.21               |
| MM + OA       | 2.75            | 2.70            | 2.75            | 2.73 | 0.03               |
| PDA           | 7.40            | 7.40            | 7.70            | 7.50 | 0.17               |
| MM + SA       | 0.40            | 0.40            | 0.40            | 0.40 | 0.00               |
| <i>fas1-2</i> |                 |                 |                 |      |                    |
| Media         | 1 <sup>st</sup> | 2 <sup>nd</sup> | 3 <sup>rd</sup> | Mean | Standard Deviation |
| CM            | 7.80            | 7.60            | 7.70            | 7.70 | 0.10               |

|                |      |      |      |      |      |
|----------------|------|------|------|------|------|
| <b>MM + G</b>  | 6.90 | 6.90 | 6.90 | 6.90 | 0.00 |
| <b>MM + OO</b> | 6.20 | 6.10 | 6.20 | 6.17 | 0.06 |
| <b>MM + OA</b> | 4.40 | 4.20 | 4.60 | 4.40 | 0.20 |
| <b>PDA</b>     | 7.50 | 7.60 | 7.40 | 7.50 | 0.10 |
| <b>MM + SA</b> | 0.40 | 0.40 | 0.40 | 0.40 | 0.00 |

B

| <b>Sample</b>  | <b>Wild</b> | <b><i>fas1-1</i></b> | <b><i>fas1-2</i></b> |
|----------------|-------------|----------------------|----------------------|
| <b>CM</b>      | 8.03 ± 0.23 | 7.65 ± 0.13          | 7.70 ± 0.10          |
| <b>MM + G</b>  | 7.03 ± 0.06 | 6.50 ± 0.26          | 6.90 ± 0.00          |
| <b>MM + OO</b> | 6.17 ± 0.19 | 5.53 ± 0.21          | 6.17 ± 0.06          |
| <b>MM + OA</b> | 5.10 ± 0.26 | 2.73 ± 0.03          | 4.40 ± 0.20          |
| <b>PDA</b>     | 7.60 ± 0.06 | 7.50 ± 0.17          | 7.50 ± 0.10          |
| <b>MM + SA</b> | 0.40 ± 0.00 | 0.40 ± 0.00          | 0.40 ± 0.00          |

C

| <b>Media</b> | <b>Significant</b> | <b>P value</b> | <b>Mean of wild</b> | <b>Mean of <i>fas1-1</i></b> | <b>Difference</b> | <b>SE of difference</b> | <b>t ratio</b> | <b>df</b> | <b>Adjusted P value</b> |
|--------------|--------------------|----------------|---------------------|------------------------------|-------------------|-------------------------|----------------|-----------|-------------------------|
| CM           | No                 | 0.0671         | 8.033               | 7.650                        | 0.3833            | 0.1537                  | 2.495          | 4.000     | 0.1298                  |
| MM+G         | Yes                | 0.0270         | 7.033               | 6.500                        | 0.5333            | 0.1563                  | 3.411          | 4.000     | 0.0788                  |
| MM+OO        | Yes                | 0.0176         | 6.167               | 5.533                        | 0.6333            | 0.1624                  | 3.899          | 4.000     | 0.0684                  |
| MM+OA        | Yes                | 0.0001         | 5.100               | 2.733                        | 2.367             | 0.1537                  | 15.40          | 4.000     | 0.0005                  |
| PDA          | No                 | 0.1890         | 7.667               | 7.500                        | 0.1667            | 0.1054                  | 1.581          | 4.000     | 0.1890                  |
| MM+AA        |                    |                | 0.4000              | 0.4000                       | 0.000             | 0.000                   |                |           |                         |
| <b>Media</b> | <b>Significant</b> | <b>P value</b> | <b>Mean of wild</b> | <b>Mean of <i>fas1-2</i></b> | <b>Difference</b> | <b>SE of difference</b> | <b>t ratio</b> | <b>df</b> | <b>Adjusted P value</b> |
| CM           | No                 | 0.083474       | 8.033               | 7.700                        | 0.3333            | 0.1453                  | 2.294          | 4.000     | 0.187224                |
| MM+G         | Yes                | 0.016130       | 7.033               | 6.900                        | 0.1333            | 0.03333                 | 4.000          | 4.000     | 0.078090                |
| MM+OO        | No                 | >0.99999       | 6.167               | 6.167                        | 0.000             | 0.1143                  | 0.000          | 4.000     | >0.999999               |
| MM+OA        | Yes                | 0.021664       | 5.100               | 4.400                        | 0.7000            | 0.1915                  | 3.656          | 4.000     | 0.083879                |
| PDA          | No                 | 0.066767       | 7.667               | 7.500                        | 0.1667            | 0.06667                 | 2.500          | 4.000     | 0.187224                |
| MM+AA        | No                 |                | 0.4000              | 0.4000                       | 0.000             | 0.000                   |                | 4.000     |                         |

**Table S4.** (A) Mycelial dry weight wildtype,  $\Delta fas1-1$  and  $\Delta fas1-2$  mutants of three biological replicates in each different carbon sources that were grown for 10 days under (12 hours day light, 12 hours dark) on complete media agar plates at temperature 26 ° C. (B) Average mycelial dry weight and standard deviation of the replicates in Table S4A. (C) P-value of the mycelium dry weight of wildtype,  $\Delta fas1-1$  and  $\Delta fas1-2$  mutants of three biological replicates was determined by calculating the significant value using two way anova with replication.

A

| Wild Type     |                 |                 |                 |      |                    |
|---------------|-----------------|-----------------|-----------------|------|--------------------|
| Media         | 1 <sup>st</sup> | 2 <sup>nd</sup> | 3 <sup>rd</sup> | Mean | Standard Deviation |
| CM            | 9.89            | 8.65            | 9.27            | 9.27 | 0.62               |
| MM + G        | 8.67            | 0.86            | 1.00            | 8.84 | 0.17               |
| MM + OO       | 5.20            | 4.80            | 5.00            | 5.00 | 0.20               |
| MM + OA       | 4.70            | 0.76            | 0.86            | 4.10 | 0.60               |
| PDA           | 7.60            | 2.01            | 1.50            | 7.48 | 0.13               |
| <i>fas1-1</i> |                 |                 |                 |      |                    |
| Media         | 1 <sup>st</sup> | 2 <sup>nd</sup> | 3 <sup>rd</sup> | Mean | Standard Deviation |
| CM            | 1.28            | 1.15            | 1.22            | 1.22 | 0.07               |
| MM + G        | 0.86            | 0.80            | 0.80            | 0.82 | 0.03               |
| MM + OO       | 1.21            | 1.80            | 1.51            | 1.51 | 0.30               |
| MM + OA       | 0.76            | 0.50            | 0.63            | 0.63 | 0.13               |
| PDA           | 2.01            | 1.84            | 1.93            | 1.93 | 0.08               |
| <i>fas1-2</i> |                 |                 |                 |      |                    |
| Media         | 1 <sup>st</sup> | 2 <sup>nd</sup> | 3 <sup>rd</sup> | Mean | Standard Deviation |
| CM            | 1.90            | 1.85            | 1.88            | 1.88 | 0.02               |
| MM + G        | 1.00            | 0.70            | 0.70            | 0.80 | 0.17               |
| MM + OO       | 3.01            | 2.20            | 2.61            | 2.61 | 0.41               |
| MM + OA       | 0.86            | 0.81            | 0.84            | 0.84 | 0.03               |
| PDA           | 1.50            | 0.97            | 1.24            | 1.24 | 0.27               |

B

| Sample        | CM          | Glucose     | Olive Oil   | Oleic Acid  | PDA         |
|---------------|-------------|-------------|-------------|-------------|-------------|
| Wild          | 9.27 ± 0.62 | 8.84 ± 0.17 | 5.00 ± 0.20 | 4.10 ± 0.60 | 7.48 ± 0.13 |
| <i>fas1-1</i> | 1.22 ± 0.07 | 0.82 ± 0.03 | 1.51 ± 0.30 | 0.63 ± 0.13 | 1.93 ± 0.08 |
| <i>Fas1-2</i> | 1.88 ± 0.02 | 0.70 ± 0.17 | 2.61 ± 0.41 | 0.84 ± 0.03 | 1.24 ± 0.27 |

C

| Media | Significant | P value | Mean of wild | Mean of <i>fas1-1</i> | Difference | SE of difference | t ratio | df    | Adjusted P value |
|-------|-------------|---------|--------------|-----------------------|------------|------------------|---------|-------|------------------|
| CM    | Yes         | <0.0001 | 9.270        | 1.217                 | 8.053      | 0.3599           | 22.38   | 4.000 | 0.0001           |
| MM+G  | Yes         | <0.0001 | 8.840        | 0.8200                | 8.020      | 0.1002           | 80.07   | 4.000 | <0.0001          |
| MM+OO | Yes         | <0.0001 | 5.000        | 1.507                 | 3.493      | 0.2058           | 16.98   | 4.000 | 0.0004           |
| MM+OA | Yes         | 0.0006  | 4.100        | 0.6300                | 3.470      | 0.3544           | 9.790   | 4.000 | 0.0031           |
| PDA   | Yes         | <0.0001 | 7.477        | 1.927                 | 5.550      | 0.08731          | 63.57   | 4.000 | <0.0001          |

| Media | Significant | P value | Mean of wild | Mean of fas1-2 | Difference | SE of difference | t ratio | df    | Adjusted P value |
|-------|-------------|---------|--------------|----------------|------------|------------------|---------|-------|------------------|
| CM    | Yes         | <0.0001 | 9.270        | 1.877          | 7.393      | 0.3583           | 20.64   | 4.000 | 0.0002           |
| MM+G  | Yes         | <0.0001 | 8.840        | 0.8000         | 8.040      | 0.1401           | 57.38   | 4.000 | <0.0001          |
| MM+OO | Yes         | 0.0008  | 5.000        | 2.607          | 2.393      | 0.2608           | 9.177   | 4.000 | 0.0039           |
| MM+OA | Yes         | 0.0007  | 4.100        | 0.8367         | 3.263      | 0.3467           | 9.412   | 4.000 | 0.0036           |
| PDA   | Yes         | <0.0001 | 7.477        | 1.237          | 6.240      | 0.1692           | 36.88   | 4.000 | <0.0001          |

**Table S5.** Number of conidia harvested from a 9 cm oatmeal agar at day 10 after incubation at 26°C.

| Sample        | Oatmeal (cell/mL)           | PDA (cell/mL)              |
|---------------|-----------------------------|----------------------------|
| <b>Wild</b>   | $2.0 \pm 0.5 \times 10^4$   | $5.0 \pm 2.1 \times 10^4$  |
| <i>fas1-1</i> | $0.25 \pm 1.70 \times 10^4$ | $1.0 \pm 1.50 \times 10^4$ |
| <i>fas1-2</i> | $0.5 \pm 2.4 \times 10^4$   | $1.0 \pm 2.11 \times 10^4$ |

**Table S6.** Size measurement of conidia length and width of 30 conidia in micrometre, wildtype, *Δfas1-1* and *Δfas1-2* mutants that were grown for 10 days under (12 hours day light, 12 hours dark) on complete media agar plates at temperature 26 ° C.

| Wild Type |                              |                            |                       |                    |
|-----------|------------------------------|----------------------------|-----------------------|--------------------|
| No        | Measured Conidia Length (cm) | Actual Conidia length (μm) | Measured Conidia (cm) | Conidia width (μm) |
| 1         | 1.40                         | 26.9                       | 0.50                  | 9.6                |
| 2         | 1.60                         | 30.8                       | 0.45                  | 8.7                |
| 3         | 1.35                         | 26.0                       | 0.45                  | 8.7                |
| 4         | 1.50                         | 28.8                       | 0.40                  | 7.7                |
| 5         | 1.90                         | 36.5                       | 0.50                  | 9.6                |
| 6         | 1.20                         | 23.1                       | 0.50                  | 9.6                |
| 7         | 1.35                         | 26.0                       | 0.45                  | 8.7                |
| 8         | 1.60                         | 30.8                       | 0.50                  | 9.6                |
| 9         | 1.40                         | 26.9                       | 0.45                  | 8.7                |
| 10        | 1.50                         | 28.8                       | 0.35                  | 6.7                |
| 11        | 1.80                         | 34.6                       | 0.40                  | 7.7                |
| 12        | 1.60                         | 30.8                       | 0.40                  | 7.7                |
| 13        | 1.60                         | 30.8                       | 0.45                  | 8.7                |
| 14        | 1.80                         | 34.6                       | 0.45                  | 8.7                |
| 15        | 1.50                         | 28.8                       | 0.40                  | 7.7                |
| 16        | 1.40                         | 26.9                       | 0.45                  | 8.7                |
| 17        | 1.85                         | 35.6                       | 0.40                  | 7.7                |
| 18        | 1.65                         | 31.7                       | 0.40                  | 7.7                |
| 19        | 1.60                         | 30.8                       | 0.35                  | 6.7                |
| 20        | 2.00                         | 38.5                       | 0.40                  | 7.7                |
| 21        | 1.60                         | 30.8                       | 0.35                  | 6.7                |
| 22        | 1.90                         | 36.5                       | 0.40                  | 7.7                |
| 23        | 1.65                         | 31.7                       | 0.40                  | 7.7                |
| 24        | 1.80                         | 34.6                       | 0.40                  | 7.7                |
| 25        | 2.10                         | 40.4                       | 0.35                  | 6.7                |
| 26        | 2.00                         | 38.5                       | 0.35                  | 6.7                |
| 27        | 1.70                         | 32.7                       | 0.45                  | 8.7                |
| 28        | 2.10                         | 40.4                       | 0.40                  | 7.7                |
| 29        | 2.10                         | 40.4                       | 0.40                  | 7.7                |
| 30        | 1.80                         | 34.6                       | 0.45                  | 8.7                |
|           | Average                      | 32.3                       | Average               | 8.1                |
|           | Standard Deviation           | 4.7                        | Standard Deviation    | 0.9                |

*fas1-1*

| No | Measured Conidia Length (cm) | Actual Conidia length ( $\mu\text{m}$ ) | Measured Conidia   | Conidia width ( $\mu\text{m}$ ) |
|----|------------------------------|-----------------------------------------|--------------------|---------------------------------|
| 1  | 1.60                         | 30.8                                    | 0.50               | 9.6                             |
| 2  | 1.80                         | 34.6                                    | 0.40               | 7.7                             |
| 3  | 1.80                         | 34.6                                    | 0.50               | 9.6                             |
| 4  | 1.30                         | 25.0                                    | 0.50               | 9.6                             |
| 5  | 1.60                         | 30.8                                    | 0.40               | 7.7                             |
| 6  | 1.85                         | 35.6                                    | 0.55               | 10.6                            |
| 7  | 1.40                         | 26.9                                    | 0.50               | 9.6                             |
| 8  | 1.40                         | 26.9                                    | 0.50               | 9.6                             |
| 9  | 1.70                         | 32.7                                    | 0.40               | 7.7                             |
| 10 | 1.60                         | 30.8                                    | 0.40               | 7.7                             |
| 11 | 1.60                         | 30.8                                    | 0.40               | 7.7                             |
| 12 | 1.50                         | 28.8                                    | 0.40               | 7.7                             |
| 13 | 1.40                         | 26.9                                    | 0.40               | 7.7                             |
| 14 | 1.30                         | 25.0                                    | 0.40               | 7.7                             |
| 15 | 1.70                         | 32.7                                    | 0.40               | 7.7                             |
| 16 | 1.80                         | 34.6                                    | 0.35               | 6.7                             |
| 17 | 1.90                         | 36.5                                    | 0.35               | 6.7                             |
| 18 | 1.70                         | 32.7                                    | 0.40               | 7.7                             |
| 19 | 1.80                         | 34.6                                    | 0.40               | 7.7                             |
| 20 | 1.80                         | 34.6                                    | 0.50               | 9.6                             |
| 21 | 1.90                         | 36.5                                    | 0.50               | 9.6                             |
| 22 | 1.60                         | 30.8                                    | 0.50               | 9.6                             |
| 23 | 1.50                         | 28.8                                    | 0.50               | 9.6                             |
| 24 | 1.40                         | 26.9                                    | 0.40               | 7.7                             |
| 25 | 1.40                         | 26.9                                    | 0.40               | 7.7                             |
| 26 | 1.60                         | 30.8                                    | 0.50               | 9.6                             |
| 27 | 1.50                         | 28.8                                    | 0.35               | 6.7                             |
| 28 | 1.40                         | 26.9                                    | 0.30               | 5.8                             |
| 29 | 1.35                         | 26.0                                    | 0.30               | 5.8                             |
| 30 | 1.50                         | 28.8                                    | 0.40               | 7.7                             |
|    | Average                      | 30.6                                    | Average            | 8.2                             |
|    | Standard Deviation           | 3.6                                     | Standard Deviation | 1.3                             |

***fas1-2***

| No | Measured Conidia Length (cm) | Actual Conidia length ( $\mu\text{m}$ ) | Measured Conidia   | Conidia width ( $\mu\text{m}$ ) |
|----|------------------------------|-----------------------------------------|--------------------|---------------------------------|
| 1  | 1.90                         | 36.5                                    | 0.35               | 6.7                             |
| 2  | 1.60                         | 30.8                                    | 0.40               | 7.7                             |
| 3  | 1.30                         | 25.0                                    | 0.40               | 7.7                             |
| 4  | 1.60                         | 30.8                                    | 0.40               | 7.7                             |
| 5  | 1.60                         | 30.8                                    | 0.35               | 6.7                             |
| 6  | 1.60                         | 30.8                                    | 0.45               | 8.7                             |
| 7  | 1.40                         | 26.9                                    | 0.50               | 9.6                             |
| 8  | 1.65                         | 31.7                                    | 0.40               | 7.7                             |
| 9  | 1.80                         | 34.6                                    | 0.40               | 7.7                             |
| 10 | 1.80                         | 34.6                                    | 0.50               | 9.6                             |
| 11 | 1.80                         | 34.6                                    | 0.40               | 7.7                             |
| 12 | 1.80                         | 34.6                                    | 0.40               | 7.7                             |
| 13 | 1.70                         | 32.7                                    | 0.40               | 7.7                             |
| 14 | 1.50                         | 28.8                                    | 0.40               | 7.7                             |
| 15 | 1.60                         | 30.8                                    | 0.50               | 9.6                             |
| 16 | 1.50                         | 28.8                                    | 0.40               | 7.7                             |
| 17 | 1.40                         | 26.9                                    | 0.40               | 7.7                             |
| 18 | 1.50                         | 28.8                                    | 0.40               | 7.7                             |
| 19 | 1.30                         | 25.0                                    | 0.50               | 9.6                             |
| 20 | 1.80                         | 34.6                                    | 0.40               | 7.7                             |
| 21 | 1.80                         | 34.6                                    | 0.50               | 9.6                             |
| 22 | 1.80                         | 34.6                                    | 0.55               | 10.6                            |
| 23 | 1.70                         | 32.7                                    | 0.55               | 10.6                            |
| 24 | 1.70                         | 32.7                                    | 0.40               | 7.7                             |
| 25 | 1.65                         | 31.7                                    | 0.50               | 9.6                             |
| 26 | 1.60                         | 30.8                                    | 0.40               | 7.7                             |
| 27 | 1.50                         | 28.8                                    | 0.40               | 7.7                             |
| 28 | 1.40                         | 26.9                                    | 0.40               | 7.7                             |
| 29 | 1.50                         | 28.8                                    | 0.40               | 7.7                             |
| 30 | 1.60                         | 30.8                                    | 0.50               | 9.6                             |
|    | Average                      | 31.0                                    | Average            | 8.3                             |
|    | Standard Deviation           | 3.1                                     | Standard Deviation | 1.1                             |

**Table S7.** (A) Conidia length and conidia width measurement of wildtype,  $\Delta fas1-1$  and  $\Delta fas1-2$  mutants of 10 days under on prune and oat agar plates at temperature 26 ° C. Three set of biological replicate spores filtered through 3 layers of lens paper and counted with a were re-suspended to a final concentration of  $5 \times 10^4$  spores per milliliter. (B) P-value of the measurement of length and width of conidia of wildtype,  $\Delta fas1-1$  and  $\Delta fas1-2$  mutants of three biological replicates was determined by calculating the significant value using two way anova with replication.

A

| Strain               | Conidia length ( $\mu\text{m}$ ) | Conidia width ( $\mu\text{m}$ ) |
|----------------------|----------------------------------|---------------------------------|
| <b>Wild type</b>     | 32.2 $\pm$ 4.7                   | 8.1 $\pm$ 0.9                   |
| <b><i>fas1-1</i></b> | 30.6 $\pm$ 3.6                   | 8.2 $\pm$ 1.3                   |
| <b><i>fas1-2</i></b> | 31.0 $\pm$ 3.1                   | 8.3 $\pm$ 1.1                   |

B

| Media          | Significant | P value | Mean of wild | Mean of <i>fas1-1</i> | Difference | SE of difference | t ratio | df    | Adjusted P value |
|----------------|-------------|---------|--------------|-----------------------|------------|------------------|---------|-------|------------------|
| Conidia length | No          | 0.1188  | 32.28        | 30.57                 | 1.707      | 1.078            | 1.583   | 58.00 | 0.2375           |
| Conidia width  | No          | 0.5279  | 8.020        | 8.203                 | -0.1833    | 0.2887           | 0.6351  | 58.00 | >0.9999          |

| Media          | Significant | P value | Mean of wild | Mean of <i>fas1-1</i> | Difference | SE of difference | t ratio | df    | Adjusted P value |
|----------------|-------------|---------|--------------|-----------------------|------------|------------------|---------|-------|------------------|
| Conidia length | No          | 0.1820  | 32.28        | 30.90                 | 1.380      | 1.022            | 1.351   | 58.00 | 0.3640           |
| Conidia width  | No          | 0.2495  | 8.020        | 8.323                 | -0.3033    | 0.2608           | 1.163   | 58.00 | 0.4990           |

**Table S8.** DNA extraction buffer, CTAB (Hexacetyltrimethylammonium bromide) buffer recipe

### CTAB (Hexacetyltrimethylammonium bromide) extraction buffer

NaCl 10.23 g  
 EDTA 0.57 g  
 CTAB 3.0 g  
 Tris 3.03 g  
 dH<sub>2</sub>O was added to a final volume of 250 mL and autoclave at 121°C for 20 minutes

**Table S9.** Sodium dodecyl sulfate polyacrylamide gel electrophoresis (SDS-PAGE) sample buffer recipe.

### 2x Sample buffer (20 mL)

0.5 M Tris-HCl (pH 6.8) 5 mL  
 Glycerol 4 mL  
 SDS 1g  
 B-mecaptoethanol 0.5 mL  
 Bromophenol blue 0.005 g  
 Distilled water was added up to 20 mL, stored in -20 °C
